# Supplementary material for: A comprehensive mechanistic model of adipocyte signaling with layers of confidence
Source: bioRxiv preprint, doi:10.1101/2022.03.11.483974, version 4 (2022-08-12)
Supplement: S5 Excel spreadsheet with the impact of type 2 diabetes [file 483974_file06.xlsx]

## Sheet: Sheet1
Source	Target	Cost (agreement to data)	Conf	DataSelection	ExpansionIteration	Type	Effect of diabetes
ATP_pip	ATP	0	100	Responders	-1	P				P = phosphorylation interaction
Ins	Alpha-AR	0	100	Responders	-1	P				PM = phosphorylation with saturation (Michaelis-Menten kinetics)
Phe	Alpha-AR	0	100	Responders	-1	D				D = dephosphorylation interaction
Epi	Alpha-AR	0	100	Responders	-1	P
Epi	Beta2-AR	0	100	Responders	-1	P
Iso	Beta2-AR	0	100	Responders	-1	P
Epi	Beta3-AR	0	100	Responders	-1	P
Ca2+_pip	Ca2+	0	100	Responders	-1	P
Ins	IR	0	100	Responders	-1	P	0.291706
Ins	PDE3B	0	100	Responders	-1	D	1.03597
PDE3B	cAMP	0	100	Responders	0	D
cAMP_pip	cAMP	0	100	Responders	-1	P
Alpha-AR	AC	0	100	Responders	0	P
Beta2-AR	AC	0	100	Responders	0	P
Beta3-AR	AC	0	100	Responders	0	P
PKB308	AS160	0	100	Responders	0	P	0.453335
PKB473	AS160	0	100	Responders	0	P	0.453335
IR	ERK	0	100	Responders	0	P	0.502617
IRS1	ERK	0	100	Responders	0	P	0.502617
ERK	Elk1	0	100	Responders	0	P	0.490172
ERK	Elk1	0	100	Responders	0	P	0.490172
PKB473	FOXO	0	100	Responders	0	P	0.616309
AS160	GLUT4	0	100	Responders	0	P	0.226667
cAMP	HSL	0	100	Responders	0	P	0.965836
IR	IRS1	0	100	Responders	0	P	0.187297
IR	IRS1307	0	100	Responders	0	P	0.382398
PKB473	PDE3B	0	100	Responders	0	P	1.03597
IRS1	PKB308	0	100	Responders	0	P	0.322035
mTORC2	PKB308	0	100	Responders	0	P	0.322035
IRS1	PKB473	0	100	Responders	0	P	1.12203
mTORC2	PKB473	0	100	Responders	0	P	1.12203
S6K	S6	0	100	Responders	0	P	0.527275
mTORC1	S6K	0	100	Responders	0	P	0.620351
AC	cAMP	0	100	Responders	0	P
PKB308	mTORC1	0	100	Responders	0	P	0.558272
PKB473	mTORC1	0	100	Responders	0	P	0.558272
IR	mTORC2	0	100	Responders	0	P	0.415919
PKB473	Bad_S112	13.8961	20	Responders	1	P	0.060432
S6K	Mtor_S1261	1.41599	15	Responders	2	D	0.508487
PKB308	Mtor_S2448	8.98092	15	Responders	2	P	-0.330404
PKB473	Mtor_S2454	14.7671	15	Responders	2	P	0.0738509
PKB308	Mtor_T2473	12.1499	15	Responders	2	P	-0.62844
PKB473	Mtor_T2474	1.4156	15	Responders	2	P	0.0575007
PKB308	Raf1_S309	8.67779	15	Responders	2	P	-0.353927
ERK	Rps6ka3_S369	13.6923	15	Responders	2	D	1.01334
PKB473	Tsc2_S1456	8.95595	15	Responders	2	P	0.0743562
PKB308	Tsc2_S981	14.8505	15	Responders	2	P	-0.135823
PKB308	Tsc2_T1466	14.4479	15	Responders	2	P	-0.305165
Mtor_S2454	Eif4ebp1_T69	1.78773	18	Responders	3	D	-0.0738882
S6K	Eif4b_S425	5.27516	14	Responders	4	P	-0.563274
PKB308	Akt1s1_S255	3.95451	13	Responders	5	P	-0.0757858
PKB473	Akt1s1_S274	1.29247	13	Responders	5	P	5.28565e-13
S6K	Eef2k_S444	0.705575	12	Responders	6	D	0.589431
S6K	Eef2k_S70	2.4805	12	Responders	6	PM	0.034812
Mtor_S2454	Rptor_S863	11.6145	12	Responders	6	P	0.0387174
Eef2k_S70	Eef2_T59	4.71531	12	Responders	7	P	-0.000407008
ERK	Hsf1_S303	9.51477	11	Responders	8	D	1.0123
Mtor_T2473	Ulk1_S477	0.976071	11	Responders	8	P	-0.236754
Mtor_T2473	Ulk1_S479	2.16289	11	Responders	8	P	-0.237669
Mtor_T2473	Ulk1_S549	14.7018	11	Responders	8	P	-0.639756
PKB308	Gab2_T388	12.7079	10	Responders	9	PM	-0.104472
ERK	Irs1_S343	10.0624	10	Responders	9	P	-0.0526422
PKB308	Mettl1_S21	10.087	10	Responders	9	PM	-0.393148
ERK	Slc9a1_S801	9.2679	10	Responders	9	P	-0.992328
PKB308	Irs1_S336	9.82927	9	Responders	10	P	-0.0850349
PKB473	Irs1_S444	13.642	9	Responders	10	P	0.0850805
PKB308	Tbc1d4_S348	8.71496	9	Responders	10	PM	-0.11207
PKB308	Tbc1d4_S698	3.06103	9	Responders	10	P	-0.123033
PKB308	Tbc1d4_S701	2.0698	9	Responders	10	P	-0.647134
ERK	Cttn_S407	6.33449	8	Responders	11	D	1.04539
ERK	Lipe_T615	15.1074	8	Responders	11	D	1.02913
S6K	Rictor_S1173	12.5535	8	Responders	11	P	-0.552414
Mtor_T2473	Rictor_S1176	8.15373	8	Responders	11	P	-0.561646
Tsc2_S1456	Tsc1_S1093	6.19189	8	Responders	11	P	0.0784431
PKB473	Pdcd4_S457	5.55362	7	Responders	12	P	0.157537
PKB473	Pdcd4_S76	9.69552	7	Responders	12	P	0.161498
ERK	Polr2a_S1913	9.04351	7	Responders	12	P	-0.15865
PKB308	Tsc2_S939	15.507	7	Responders	12	PM	-0.120592
Mtor_S2448	Deptor_S265	4.41458	6	Responders	13	P	-0.347308
Mtor_T2473	Maf1_S75	12.3791	6	Responders	13	PM	-0.404362
PKB308	Vim_S39	7.90861	6	Responders	13	P	-0.131039
PKB308	Acin1_S670	4.47832	5	Responders	14	P	-0.264595
PKB308	Acly_S455	6.93211	5	Responders	14	P	-0.334964
PKB308	Srpk2_S488	2.82061	5	Responders	14	P	-0.850653
PKB473	Srpk2_S491	3.55024	5	Responders	14	P	0.078847
ERK	Stim1_S521	6.00031	5	Responders	14	D	1.06667
ERK	Stim1_S524	7.47151	5	Responders	14	P	-0.00354477
Mtor_S2448	Clip1_S347	1.89254	4	Responders	15	D	0.250004
PKB308	Eif4b_S422	13.8009	4	Responders	15	P	-0.421751
Mtor_T2473	Gphn_S188	5.0014	4	Responders	15	P	-0.376417
PKB308	Lmna_S407	11.7213	4	Responders	15	P	-0.456567
ERK	Nup153_S218	12.9429	4	Responders	15	P	-1.01083
ERK	Nup153_S335	7.20138	4	Responders	15	P	-0.508661
PKB473	Ranbp3_S58	15.4733	4	Responders	15	PM	0.0574189
Mtor_T2474	Tfeb_S167	2.66101	4	Responders	15	P	0.0180438
Mtor_S1261	Tfeb_S172	4.04071	4	Responders	15	D	-0.215485
Mtor_T2473	Tfeb_S180	15.104	4	Responders	15	P	-0.128367
PKB473	Ahnak_S1321	8.03542	3	Responders	16	D	-0.0661679
PKB308	Ahnak_S2566	5.04323	3	Responders	16	P	-7.81956e-13
PKB308	Ahnak_S5303	11.0111	3	Responders	16	P	-0.0252954
PKB308	Ahnak_S5393	2.87835	3	Responders	16	P	-0.0192174
PKB308	Ahnak_S5508	3.95488	3	Responders	16	P	-0.123033
PKB473	Ahnak_S5512	14.9635	3	Responders	16	P	5.37215e-13
PKB473	Ahnak_S5518	0.504634	3	Responders	16	P	0.00171349
PKB308	Ahnak_S5519	2.18371	3	Responders	16	D	0.338003
PKB473	Ahnak_S5535	13.1981	3	Responders	16	P	0.0647228
PKB308	Ahnak_S5536	2.2811	3	Responders	16	P	-0.657408
PKB473	Ahnak_S5542	1.03042	3	Responders	16	P	-0.13122
PKB473	Ahnak_S5617	14.8727	3	Responders	16	P	3.94662e-13
PKB308	Ahnak_S5620	2.05547	3	Responders	16	P	-0.0456221
PKB473	Ahnak_S5623	1.49078	3	Responders	16	P	-0.145972
Mtor_S1261	Bag3_S297	6.10925	3	Responders	16	D	-0.224921
Mtor_T2473	Bag3_S380	1.05595	3	Responders	16	P	-0.258681
PKB473	Cttn_T401	5.28442	3	Responders	16	D	-0.227713
PKB308	Itpr1_S1740	3.91839	3	Responders	16	D	0.877569
ERK	Pcyt1a_S331	2.98829	3	Responders	16	P	-0.199858
PKB308	Pkn2_S582	8.0714	3	Responders	16	P	-0.711103
PKB473	Rgcc_S97	10.5479	3	Responders	16	P	0.0920942
Mtor_S2454	Rragc_S381	4.03057	3	Responders	16	D	0.11411
PKB473	Slc2a4_S10	3.12264	3	Responders	16	P	5.36574e-13
Mtor_T2473	Ankrd17_S2040	9.18524	2	Responders	17	P	-0.134898
PKB473	C2cd5_S295	2.385	2	Responders	17	P	0.0376336
ERK	Dmtn_S92	0.908972	2	Responders	17	P	-1.03521
Mtor_T2473	Eif3b_S111	10.9265	2	Responders	17	P	-0.576559
Pdcd4_S457	Eif4g1_S1081	6.4902	2	Responders	17	D	-0.168802
Raf1_S309	Ints10_S231	5.56897	2	Responders	17	P	-0.334279
S6K	Irf3_S123	1.63458	2	Responders	17	P	-0.434519
IRS1307	Irs2_S1151	4.0956	2	Responders	17	P	-0.267701
IRS1307	Irs2_S362	10.2114	2	Responders	17	P	-1.22008
IRS1307	Irs2_S635	9.80019	2	Responders	17	P	-1.22175
Mtor_S2454	Larp1_T1048	8.89903	2	Responders	17	P	0.0729979
PKB473	Mitf_S414	13.6792	2	Responders	17	P	0.0941202
Mtor_T2474	Patl1_S179	8.25263	2	Responders	17	D	-0.0487383
Mtor_S2454	Patl1_S184	15.042	2	Responders	17	P	0.0593697
PKB308	Ralgapa2_S696	9.17889	2	Responders	17	P	-0.0721099
Mtor_S2454	Ubr4_T2712	2.58901	2	Responders	17	D	-0.0390203
PKB308	Zranb2_S300	14.6501	2	Responders	17	D	-1.38365e-06
ERK	Akap12_S634	9.29529	1	Responders	18	P	-0.520792
ERK	Akap12_S637	8.50844	1	Responders	18	P	-0.153416
Vim_S39	Arhgef2_S951	15.5015	1	Responders	18	P	-0.0459248
ERK	Brd4_S1154	12.815	1	Responders	18	D	0.449085
S6K	Camk2d_S315	11.3881	1	Responders	18	D	0.0703474
S6K	Camk2d_T287	15.3442	1	Responders	18	P	-0.0664289
Rps6ka3_S369	Camk2g_S315	7.52796	1	Responders	18	P	0.196591
PKB308	Ccm2_S402	5.72532	1	Responders	18	P	-0.00779265
Rps6ka3_S369	Cdk16_S110	6.45812	1	Responders	18	P	0.958881
ERK	Cep170_S1155	9.25287	1	Responders	18	D	0.61374
ERK	Cep170b_S881	8.84648	1	Responders	18	D	1.05238
Rps6ka3_S369	Dclk1_S332	11.0468	1	Responders	18	D	-0.896333
ERK	Dennd4c_S1036	12.3512	1	Responders	18	D	0.906052
ERK	Dennd4c_S1145	12.3502	1	Responders	18	D	0.627652
S6K	Dnajc2_S47	7.49795	1	Responders	18	D	0.805662
Rps6ka3_S369	Fnbp1_S298	3.66727	1	Responders	18	P	0.845281
Rps6ka3_S369	Gys1_S641	13.6111	1	Responders	18	PM	0.53645
Rps6ka3_S369	Gys1_S647	11.0694	1	Responders	18	PM	0.475639
Rps6ka3_S369	Gys1_S649	4.23954	1	Responders	18	P	0.875201
Rps6ka3_S369	Gys1_S672	2.52943	1	Responders	18	P	0.629555
PKB308	Hbp1_S145	15.4797	1	Responders	18	P	-0.212674
Rps6ka3_S369	Irf2bpl_S638	10.2707	1	Responders	18	P	1.04371
Rps6ka3_S369	Irf2bpl_S641	3.59701	1	Responders	18	P	1.03279
Mtor_T2473	Irs2_S1266	14.9767	1	Responders	18	P	-0.413104
PKB308	Irs2_S303	7.56267	1	Responders	18	P	-0.0809168
PKB308	Itgb5_T782	1.54252	1	Responders	18	P	-0.0283951
PKB308	Itsn1_S313	7.08369	1	Responders	18	P	-0.606545
PKB473	Itsn1_S315	13.2808	1	Responders	18	P	0.276287
PKB308	Larp1_S1032	11.8202	1	Responders	18	PM	-0.0338342
ERK	Lipe_S555	9.09758	8	Responders	18	D	2.00569
Rps6ka3_S369	Lipe_S555	9.09758	1	Responders	18	PM	2.00569
Mtor_T2473	Lpin1_S323	4.35076	1	Responders	18	P	-0.242844
Rps6ka3_S369	Map1a_S2000	11.9987	1	Responders	18	D	-1.05111
PKB308	Map2_S1787	0.554995	1	Responders	18	P	-0.184268
ERK	Mast2_S1368	12.5614	1	Responders	18	D	1.06636
PKB473	Mllt4_S1179	11.6104	1	Responders	18	P	5.36254e-13
PKB308	Mllt4_S1180	6.03112	1	Responders	18	P	-4.39895e-12
PKB473	Ncor2_S1784	2.67778	1	Responders	18	P	0.00799153
PKB473	Nedd4l_S488	2.1816	1	Responders	18	P	-0.127635
PKB473	Nedd4l_S496	4.68261	1	Responders	18	P	0.00448069
Rps6ka3_S369	Phkb_S27	0.977253	1	Responders	18	P	1.01326
Rps6ka3_S369	Plec_T3889	9.96434	1	Responders	18	P	1.01325
Rps6ka3_S369	Plin1_S222	4.61905	1	Responders	18	P	1.04419
Rps6ka3_S369	Plin1_S463	8.03658	1	Responders	18	P	1.02955
Rps6ka3_S369	Plin1_T82	11.2272	1	Responders	18	P	1.01318
PKB308	Pnisr_S290	2.08152	1	Responders	18	P	-0.699419
Rps6ka3_S369	Pnn_S701	15.081	1	Responders	18	P	0.0640808
PKB473	Rxra_S22	12.7152	1	Responders	18	P	0.132017
Ulk1_S549	Smcr8_S416	1.10291	1	Responders	18	P	-0.188952
Ulk1_S477	Smcr8_S491	10.0512	1	Responders	18	P	-8.02772e-11
Irs1_S336	Sorbs1_S285	4.81713	1	Responders	18	P	-0.0841146
Rps6ka3_S369	Sptbn1_S2315	7.52982	1	Responders	18	P	0.734375
Rps6ka3_S369	Ssfa2_S326	5.39932	1	Responders	18	P	0.440726
Rps6ka3_S369	Ssfa2_S330	3.79064	1	Responders	18	P	0.493157
PKB473	Tjp2_S147	13.6016	1	Responders	18	P	-0.0596727
Rps6ka3_S369	Tjp2_S147	13.6016	1	Responders	18	D	-0.0596727
ERK	Tnks1bp1_S429	12.3628	3	Responders	18	D	2.06351
Rps6ka3_S369	Tnks1bp1_S429	12.3628	1	Responders	18	P	2.06351
ERK	Tnks1bp1_S763	12.183	3	Responders	18	PM	-1.53223
Rps6ka3_S369	Tnks1bp1_S763	12.183	1	Responders	18	D	-1.53223
Mtor_S2454	Trim28_S473	13.514	1	Responders	18	P	0.0834999
Nup153_S335	Zeb2_S784	11.1778	1	Responders	18	P	-0.50861
Nup153_S218	Zeb2_T782	2.37724	1	Responders	18	P	-0.372412
Rps6ka3_S369	Plin1_S410	13.3949	1	Responders	19	P	0.881293
Rxra_S22	Plin1_S410	13.3949	1	Responders	19	D	0.881293
Rps6ka3_S369	Plin1_S81	6.91706	1	Responders	19	P	0.881295
Rxra_S22	Plin1_S81	6.91706	1	Responders	19	D	0.881295
PKB473	Cables1_S379	6.57725	0	Responders	20	P	0.0950859
PKB308	Rps6ka3_S375	14.9007	0	Responders	20	PM	-1.43504
ERK	Rps6ka3_S375	14.9007	15	Responders	20	PM	-1.43504
Rps6ka3_S375	Add1_S12	11.2854	1	Responders	21	PM	-0.578563
Rps6ka3_S375	Add1_S613	12.1514	1	Responders	21	P	-0.900825
Rps6ka3_S375	Add3_S402	12.7626	1	Responders	21	P	-0.570427
Rps6ka3_S375	Arhgef12_S638	0.359521	1	Responders	21	P	-0.740466
Rps6ka3_S375	Braf_S135	15.2168	1	Responders	21	P	-0.667436
Rps6ka3_S375	Casp8_S213	1.90164	2	Responders	21	P	-0.964971
Rps6ka3_S375	Ctdp1_S830	6.33504	1	Responders	21	P	-0.533819
Rps6ka3_S369	Dmtn_S96	3.68526	1	Responders	21	D	-1.37366
Rps6ka3_S375	Dmtn_S96	3.68526	1	Responders	21	P	-1.37366
Rps6ka3_S375	Epb41l1_S543	14.5892	1	Responders	21	P	-0.979756
Rps6ka3_S375	Gys1_S653	1.39661	1	Responders	21	P	-0.38399
Rps6ka3_S375	Lipe_S585	7.08994	1	Responders	21	P	-0.676431
Rps6ka3_S375	Lipe_S694	0.474805	1	Responders	21	D	1.40738
Rps6ka3_S375	Map1a_S2450	0.572484	1	Responders	21	P	-1.19886
ERK	Map1a_S2464	14.674	1	Responders	21	D	0.864182
Rps6ka3_S375	Map1a_S2464	14.674	1	Responders	21	D	0.864182
Rps6ka3_S375	Map1a_S622	6.14741	1	Responders	21	P	-0.770286
Rps6ka3_S375	Nolc1_S625	8.07977	1	Responders	21	P	-1.11207
Rps6ka3_S375	Spag9_S719	2.81282	1	Responders	21	D	0.946456
Rps6ka3_S375	Ssfa2_T85	7.57762	1	Responders	21	D	1.43499
Rps6ka3_S375	Thrap3_S238	11.4381	1	Responders	21	P	-0.85847
Rps6ka3_S375	Thrap3_S253	3.71497	1	Responders	21	P	-0.726098
Rps6ka3_S375	Thrap3_S695	3.9774	1	Responders	21	P	-0.605954
Rps6ka3_S375	Tnks1bp1_S1657	9.66414	1	Responders	21	P	-0.508054
Rps6ka3_S375	Tnks1bp1_S539	9.98923	1	Responders	21	P	-0.784883
Rps6ka3_S375	Tnks1bp1_S568	0.686598	1	Responders	21	P	-0.925705
Rps6ka3_S369	Tnks1bp1_T1025	10.4823	1	Responders	21	D	-2.01629
Rps6ka3_S375	Tnks1bp1_T1025	10.4823	1	Responders	21	P	-2.01629
Arhgef12_S638	Arhgef7_S717	6.5129	1	Responders	22	P	-1.20104e-10
PKB473	Bad_S134	6.62039	20	Nonresponders	23	P	0.0438328
PKB473	Bad_S136	3.65091	20	Nonresponders	23	P	0.0380705
PKB308	Bad_S155	1.14061	20	Nonresponders	23	P	-0.265171
PKB473	Bad_S170	12.365	20	Nonresponders	23	P	2.73938e-11
PKB473	Foxo1_S284	0.217635	20	Nonresponders	23	P	0.00828428
PKB473	Foxo1_S295	2.34452	20	Nonresponders	23	P	0.0270507
PKB473	Gsk3b_S219	0.513567	20	Nonresponders	23	P	-0.164585
PKB473	Gsk3b_Y216	1.29816	20	Nonresponders	23	P	0.000694803
Gsk3b_Y216	Ctnnb1_S552	13.3531	19	Nonresponders	24	P	0.000694735
Mtor_T2473	Eif4ebp1_S100	2.75	18	Nonresponders	25	P	-0.348534
Mtor_S2448	Eif4ebp1_S64	3.18974	18	Nonresponders	25	P	-0.207464
Mtor_S1261	Eif4ebp1_T36	4.77106	18	Nonresponders	25	D	-0.0697592
Mtor_S2454	Eif4ebp1_T45	5.5471	18	Nonresponders	25	P	0.00764672
PKB473	Foxo4_S230	8.77228	17	Nonresponders	26	P	0.0627642
PKB473	Mdm2_S163	14.611	17	Nonresponders	26	P	0.00636049
PKB473	Mdm2_S183	12.8961	17	Nonresponders	26	P	0.0487616
PKB473	Cdkn1b_S10	6.24181	16	Nonresponders	27	P	0.000542877
ERK	Dapk1_S319	3.91213	15	Nonresponders	28	P	-0.108145
Eif4ebp1_T69	Eif4e_S24	1.78976	15	Nonresponders	28	P	0.14296
S6K	Mtor_S2478	10.625	15	Nonresponders	28	P	-0.0857683
S6K	Mtor_S2481	12.5431	15	Nonresponders	28	P	-0.149789
PKB308	Raf1_S259	1.56914	15	Nonresponders	28	P	-0.146612
PKB473	Raf1_S321	13.5985	15	Nonresponders	28	P	0.0598918
PKB473	Raf1_S641	0.692107	15	Nonresponders	28	P	0.00259199
ERK	Rps6ka3_S415	2.74669	15	Nonresponders	28	P	-0.57859
ERK	Rps6ka3_S715	2.52909	15	Nonresponders	28	P	-0.785982
ERK	Rps6ka3_T365	3.86933	15	Nonresponders	28	P	-1.02881
PKB473	Tsc2_S1132	4.09172	15	Nonresponders	28	P	0.0366892
PKB473	Tsc2_S1413	2.52415	15	Nonresponders	28	P	-0.158524
Mtor_T2474	Akt1_S122	9.706	14	Nonresponders	29	P	0.00538662
Mtor_S2454	Akt1_S124	0.959739	14	Nonresponders	29	P	0.00736791
Mtor_S2448	Akt1_S126	0.755654	14	Nonresponders	29	P	-0.0325062
Mtor_S1261	Akt1_S129	10.4746	14	Nonresponders	29	P	0.0031656
S6K	Eif4b_S406	4.4711	14	Nonresponders	29	P	-0.0561647
S6K	Eif4b_S409	5.26261	14	Nonresponders	29	P	-0.238316
S6K	Eif4b_S445	2.19606	14	Nonresponders	29	P	-0.271386
S6K	Eif4b_S459	1.07715	14	Nonresponders	29	P	-0.320496
S6K	Eif4b_S497	12.2874	14	Nonresponders	29	D	0.221607
S6K	Eif4b_S498	13.9642	14	Nonresponders	29	D	0.052392
S6K	Eif4b_S504	1.67769	14	Nonresponders	29	P	-0.205164
ERK	Gab1_S266	13.7099	14	Nonresponders	29	P	-0.798239
ERK	Sos1_S1261	11.4871	14	Nonresponders	29	P	-0.666077
Akt1_S124	Tsc2_S1389	14.0806	15	Nonresponders	30	P	-0.00316676
PKB308	Akt1s1_S159	7.24915	13	Nonresponders	31	P	-0.171273
PKB473	Akt1s1_S163	0.376795	13	Nonresponders	31	P	0.0107887
Akt1_S126	Akt1s1_S275	1.07639	13	Nonresponders	31	P	-0.0395214
Akt1_S126	Akt1s1_S283	10.4935	13	Nonresponders	31	P	-0.0254952
Akt1_S126	Akt1s1_S284	13.3898	13	Nonresponders	31	P	-0.0325023
Akt1_S124	Akt1s1_T270	2.1592	13	Nonresponders	31	P	0.00271591
Gsk3b_S219	Apc_S1040	10.9685	13	Nonresponders	31	P	-0.17253
Gsk3b_S219	Apc_S1359	5.60595	13	Nonresponders	31	P	-0.0993878
Gsk3b_Y216	Apc_S2834	6.36669	13	Nonresponders	31	P	0.000694699
Gsk3b_Y216	Apc_S2837	6.36653	13	Nonresponders	31	P	0.000694699
Gsk3b_S219	Apc_T1437	2.4684	13	Nonresponders	31	P	-0.0993878
Gsk3b_Y216	Gys1_S657	13.7848	13	Nonresponders	31	P	0.000694674
S6K	Rps6_S247	4.95292	13	Nonresponders	31	P	-0.333024
Akt1_S122	Ccdc88a_S233	4.87073	12	Nonresponders	32	P	0.00470386
Akt1_S126	Ccdc88a_S237	15.4074	12	Nonresponders	32	P	0.00751036
PKB473	Ccdc88a_S237	15.4074	12	Nonresponders	32	P	0.00751036
PKB473	Ccdc88a_T1419	3.29908	12	Nonresponders	32	P	0.040843
Eef2k_S444	Eef2_T57	0.777314	12	Nonresponders	32	P	0.451125
S6K	Eef2k_S469	5.49079	12	Nonresponders	32	P	-0.0063776
S6K	Eef2k_S473	2.21717	12	Nonresponders	32	D	0.317777
S6K	Eef2k_S73	3.87827	12	Nonresponders	32	D	0.3787
S6K	Eef2k_T71	11.7192	12	Nonresponders	32	P	-0.304983
PKB473	Ep300_S1037	0.346004	12	Nonresponders	32	D	-0.0412285
Braf_S135	Map2k2_S295	3.35102	12	Nonresponders	32	P	-0.311392
ERK	Pla2g4a_S434	3.3607	12	Nonresponders	32	D	0.405092
ERK	Pla2g4a_S435	1.55013	12	Nonresponders	32	P	-0.0101635
Gsk3b_S219	Psen1_S367	4.00198	12	Nonresponders	32	P	-0.0993878
Gsk3b_S219	Psen1_T370	7.65378	12	Nonresponders	32	P	-0.0993878
Mtor_T2473	Rptor_S722	6.79806	12	Nonresponders	32	D	0.25479
Mtor_S2448	Rptor_S859	13.1058	12	Nonresponders	32	D	0.204034
Mtor_S2481	Rptor_S877	4.52154	12	Nonresponders	32	P	-0.0582283
ERK	Stat5a_S127	2.64765	12	Nonresponders	32	P	-0.00354477
Akt1_S129	Ybx1_S163	3.24651	12	Nonresponders	32	P	0.000171192
PKB308	Ybx1_S165	2.47879	12	Nonresponders	32	P	-1.30347e-12
Akt1_S122	Ybx1_S172	13.9575	12	Nonresponders	32	D	-0.0027174
PKB308	Ybx1_S174	7.52049	12	Nonresponders	32	P	-1.22179e-12
PKB308	Ywhaz_S45	8.16175	12	Nonresponders	32	P	-0.0114369
Akt1_S122	Creb1_S340	13.1177	11	Nonresponders	33	D	-0.00361021
ERK	Egfr_S1166	7.49745	11	Nonresponders	33	P	-0.511351
Gsk3b_S219	Hnrnpd_S83	10.4402	11	Nonresponders	33	P	-0.0993878
ERK	Hsf1_S307	11.5093	11	Nonresponders	33	P	-0.874355
Akt1_S124	Map3k8_S141	2.3316	11	Nonresponders	33	P	1.28137e-15
ERK	Ncoa1_S372	0.332352	11	Nonresponders	33	P	-0.0424333
ERK	Ncoa1_S702	2.0825	11	Nonresponders	33	D	0.774445
Rps6ka3_S715	Nfatc4_S289	3.63876	11	Nonresponders	33	P	-0.306155
Gsk3b_Y216	Nfkb1_S447	6.96665	11	Nonresponders	33	P	0.000694733
Gsk3b_Y216	Ppp1r2_S122	2.13797	11	Nonresponders	33	P	0.000694667
Gsk3b_Y216	Ppp1r2_S123	3.69481	11	Nonresponders	33	P	3.20343e-16
Mtor_S1261	Ulk1_S643	1.37777	11	Nonresponders	33	PM	-0.124247
Mtor_S2454	Ulk1_S643	1.37777	11	Nonresponders	33	D	-0.124247
Mtor_S2478	Ulk1_T665	11.9955	11	Nonresponders	33	P	-0.00294181
Egfr_S1166	Cav1_S9	10.9769	11	Nonresponders	34	P	-0.476553
Egfr_S1166	Ctnnd1_S252	12.0076	12	Nonresponders	34	D	0.51126
Egfr_S1166	Ctnnd1_S346	12.125	12	Nonresponders	34	P	-0.511292
Egfr_S1166	Ctnnd1_S352	0.700437	12	Nonresponders	34	P	-1.1182e-10
Egfr_S1166	Errfi1_S251	1.99361	11	Nonresponders	34	P	-0.254522
Egfr_S1166	Plcg1_S1248	12.8289	20	Nonresponders	34	P	-0.511287
Egfr_S1166	Src_S17	1.15222	12	Nonresponders	34	P	-0.216618
Src_S17	Arhgap35_S1179	1.65113	14	Nonresponders	35	P	-0.133987
Src_S17	Arhgap35_S975	4.2127	14	Nonresponders	35	P	-0.144098
Src_S17	Arhgap35_Y1105	1.36559	14	Nonresponders	35	P	-0.118791
Src_S17	Cav2_S20	0.434456	14	Nonresponders	35	P	2.2424e-15
Src_S17	Cav2_S23	1.6807	14	Nonresponders	35	P	6.40685e-16
Src_S17	Cav2_Y19	1.43235	14	Nonresponders	35	P	-0.0404284
Src_S17	Cttn_S405	8.13766	16	Nonresponders	35	P	-0.216594
Src_S17	Dnm1_S770	15.3385	14	Nonresponders	35	PM	-0.216578
Src_S17	Inppl1_S132	13.4269	13	Nonresponders	35	P	-0.216591
Src_S17	Pak2_S2	1.47737	11	Nonresponders	35	P	-0.0625845
Src_S17	Pdpk1_S244	7.55112	13	Nonresponders	35	P	-0.119143
Src_S17	Ptk2b_S375	3.13134	17	Nonresponders	35	P	-5.13211e-10
Src_S17	Ptpra_S176	4.17825	12	Nonresponders	35	P	-0.146045
Pdpk1_S244	Akt2_S126	6.79785	13	Nonresponders	36	P	-0.116409
Pdpk1_S244	Prkcd_S669	3.91495	11	Nonresponders	36	P	-0.119131
Pdpk1_S244	Prkcd_S671	5.24411	11	Nonresponders	36	P	1.28137e-15
Pdpk1_S244	Prkcd_S688	5.53333	11	Nonresponders	36	P	-0.0188553
Prkcd_S669	Il6st_S665	12.2664	12	Nonresponders	37	D	0.118163
Prkcd_S671	Il6st_T668	11.1406	12	Nonresponders	37	P	-2.56274e-15
Prkcd_S669	Irs1_S1072	11.9851	12	Nonresponders	37	P	-0.119118
Prkcd_S669	Irs1_S1094	15.0529	12	Nonresponders	37	P	-0.119105
Prkcd_S669	Irs1_S1095	14.5022	12	Nonresponders	37	P	-0.119118
Prkcd_S669	Irs1_S1137	11.7683	12	Nonresponders	37	P	-0.119115
Prkcd_S669	Irs1_S1211	3.8642	12	Nonresponders	37	P	-0.0103291
Prkcd_S669	Irs1_S340	10.5132	12	Nonresponders	37	P	-0.0105436
Prkcd_S669	Irs1_T441	9.68564	12	Nonresponders	37	P	-0.0103874
Src_S17	Afap1_S284	14.1305	10	Nonresponders	38	P	-5.76617e-15
Src_S17	Afap1_S343	2.88064	10	Nonresponders	38	P	2.56274e-15
Src_S17	Afap1_S344	2.88064	10	Nonresponders	38	P	1.28137e-15
Src_S17	Afap1_S666	5.80067	10	Nonresponders	38	P	-0.203369
Src_S17	Afap1_S669	0.939266	10	Nonresponders	38	P	-0.0993828
Ulk1_S479	Atg13_S360	7.9001	10	Nonresponders	38	P	-0.0523346
PKB473	Dlc1_S120	2.30135	10	Nonresponders	38	P	0.0348263
PKB308	Dlc1_S123	6.78699	10	Nonresponders	38	D	0.664647
PKB308	Dlc1_S174	4.93909	10	Nonresponders	38	D	0.0340875
PKB308	Dlc1_S440	10.9796	10	Nonresponders	38	P	-0.0658508
PKB473	Dlc1_S466	14.1838	10	Nonresponders	38	P	0.00193281
PKB473	Dlc1_S584	6.59383	10	Nonresponders	38	PM	0.113887
PKB308	Dlc1_S894	10.7641	10	Nonresponders	38	D	0.0121211
PKB308	Hmox1_S242	4.01816	10	Nonresponders	38	P	-0.0281529
Akt1_S126	Htt_S412	0.832031	10	Nonresponders	38	P	-0.0595457
PKB308	Htt_S621	15.0133	10	Nonresponders	38	PM	-0.00955809
ERK	Irs1_S1134	1.3045	10	Nonresponders	38	P	-0.549236
ERK	Irs1_S1202	6.94464	10	Nonresponders	38	P	-0.653404
ERK	Irs1_T448	11.4363	10	Nonresponders	38	P	-0.706952
Akt1_S129	Pea15_S104	7.12041	10	Nonresponders	38	P	0.00316475
PKB308	Pea15_S116	9.64163	10	Nonresponders	38	D	0.467385
Casp8_S213	Ripk1_S313	1.43513	10	Nonresponders	38	P	-0.354015
ERK	Slc9a1_S697	1.09882	10	Nonresponders	38	P	-0.00354477
ERK	Slc9a1_S790	14.7525	10	Nonresponders	38	P	-0.0508554
ERK	Slc9a1_S792	4.43234	10	Nonresponders	38	PM	-0.000650373
Src_S17	Sptan1_S1197	2.59636	10	Nonresponders	38	P	-0.196461
ERK	Adam17_T783	14.5079	9	Nonresponders	39	D	0.752935
ERK	Arrb1_S404	10.128	9	Nonresponders	39	D	0.138755
ERK	Atf2_T51	12.2556	9	Nonresponders	39	PM	-0.235454
ERK	Atf2_T53	13.2582	9	Nonresponders	39	P	-0.449261
Akt1_S129	Braf_S348	5.75939	9	Nonresponders	39	P	0.00314993
ERK	Braf_S483	2.63955	9	Nonresponders	39	P	-4.30336e-06
PKB308	Braf_S766	3.74801	9	Nonresponders	39	P	-0.00448275
ERK	Cad_S1406	15.301	9	Nonresponders	39	D	0.860829
ERK	Cad_S1938	11.4698	9	Nonresponders	39	P	-0.0796597
Ripk1_S313	Casp8_S188	8.26984	9	Nonresponders	39	P	-7.161e-11
Gsk3b_S219	Eif2b5_S540	2.21784	9	Nonresponders	39	P	-0.164505
Src_S17	Gtf2i_S783	0.690338	9	Nonresponders	39	P	-0.131103
Ripk1_S313	Ikbkg_S398	3.06136	9	Nonresponders	39	P	-0.158331
PKB473	Irs1_S3	14.317	9	Nonresponders	39	P	0.0186749
PKB308	Irs1_S324	15.1874	9	Nonresponders	39	PM	-0.149398
PKB308	Irs1_S526	15.0552	9	Nonresponders	39	PM	-0.141088
PKB473	Irs1_S887	11.8576	9	Nonresponders	39	P	0.187921
S6K	Pdcd4_S313	8.47508	9	Nonresponders	39	D	0.29544
S6K	Pdcd4_S94	5.14768	9	Nonresponders	39	D	0.28828
PKB473	Tbc1d4_S598	1.1463	9	Nonresponders	39	D	-0.166109
Akt1_S124	Tbc1d4_S680	9.81769	9	Nonresponders	39	P	-0.000982693
PKB473	Tbc1d4_S731	5.43321	9	Nonresponders	39	P	0.0100854
PKB473	Wnk1_S1840	1.34182	9	Nonresponders	39	P	0.00213085
PKB473	Wnk1_S1842	14.5852	9	Nonresponders	39	P	3.7352e-13
Akt1_S124	Wnk1_S1845	3.34185	9	Nonresponders	39	P	0.0034862
PKB308	Wnk1_S2099	2.82173	9	Nonresponders	39	D	0.945787
Src_S17	Asap1_S732	2.42458	8	Nonresponders	40	P	-0.199617
Src_S17	Asap1_S854	5.89951	8	Nonresponders	40	P	-2.72291e-15
Dapk1_S319	Camkk2_S133	5.6355	8	Nonresponders	40	P	-3.74489e-11
ERK	Cttn_S417	9.48801	8	Nonresponders	40	P	-1.03651
Mtor_T2473	Dap_S3	3.61082	8	Nonresponders	40	P	-0.236303
Mtor_S1261	Dap_S51	1.1326	8	Nonresponders	40	D	-0.077894
ERK	Etv6_S185	2.00776	8	Nonresponders	40	P	-0.147112
ERK	Etv6_S205	1.6613	8	Nonresponders	40	P	-0.313732
ERK	Etv6_S22	7.77803	8	Nonresponders	40	P	-0.277437
ERK	Etv6_T18	0.611523	8	Nonresponders	40	P	-0.00354477
Camk2g_S315	Flna_S2152	15.0617	8	Nonresponders	40	D	-0.196565
Egfr_S1166	Hdac6_S43	1.31668	8	Nonresponders	40	D	0.447193
Rps6ka3_S715	Hmgn1_S87	8.1747	8	Nonresponders	40	P	-0.0392526
ERK	Lipe_S602	10.9862	8	Nonresponders	40	D	0.865917
ERK	Mapk14_S2	12.0948	8	Nonresponders	40	D	0.0931632
ERK	Mapk14_Y182	13.4682	8	Nonresponders	40	P	-0.347481
ERK	Med1_S1158	5.44187	8	Nonresponders	40	P	-1.68162e-10
ERK	Med1_S1209	10.4977	8	Nonresponders	40	P	-1.01295
ERK	Med1_S1225	0.846841	8	Nonresponders	40	P	-0.0472656
ERK	Med1_T1051	0.618928	8	Nonresponders	40	P	-0.00354477
ERK	Med1_T1217	5.21263	8	Nonresponders	40	P	-0.107622
ERK	Ppp1r9b_S100	13.7662	8	Nonresponders	40	D	0.99239
ERK	Ppp1r9b_S192	0.711104	8	Nonresponders	40	P	-1.6818e-10
Pdpk1_S244	Prkaca_T198	2.0654	8	Nonresponders	40	P	1.92206e-15
Mtor_T2474	Rictor_S1283	10.4517	8	Nonresponders	40	P	0.00366593
Mtor_S1261	Rictor_S21	2.08267	8	Nonresponders	40	D	-0.0857832
Ncor2_S1784	Snw1_S232	4.99265	8	Nonresponders	40	P	9.15347e-12
Wnk1_S1840	Stk39_S397	6.59847	8	Nonresponders	40	PM	0.00062055
Tsc2_S1456	Tsc1_S501	7.24552	8	Nonresponders	40	P	0.00382929
Tsc2_S1389	Tsc1_S517	13.4664	8	Nonresponders	40	P	-0.010945
Src_S17	Vcl_S290	1.47759	8	Nonresponders	40	P	-0.216588
Src_S17	Vcl_S434	2.54439	8	Nonresponders	40	P	-0.216594
Src_S17	Vcl_S721	5.90203	8	Nonresponders	40	P	-0.192136
Camk2d_T287	Vim_S214	13.762	8	Nonresponders	40	PM	-0.039183
Camk2d_S315	Vim_S325	12.2255	8	Nonresponders	40	D	-0.0703358
Camk2d_T287	Vim_S430	12.0104	8	Nonresponders	40	P	-0.0162625
Pak2_S2	Vim_S438	12.8294	8	Nonresponders	40	P	-2.59e-09
Src_S17	Wwox_S14	5.42342	8	Nonresponders	40	P	-0.0349949
Src_S17	Wwox_T12	5.1433	8	Nonresponders	40	P	-0.0352786
Akt1_S129	Yap1_S113	9.84336	8	Nonresponders	40	P	0.000171192
Akt1_S122	Yap1_S46	5.21247	8	Nonresponders	40	P	0.00538558
Akt1_S124	Yap1_S94	0.667849	8	Nonresponders	40	P	0.0025271
Akt1_S129	Yap1_T104	8.02928	8	Nonresponders	40	P	0.00315099
Akt1_S126	Yap1_T95	1.67666	8	Nonresponders	40	P	6.40685e-16
Prkaca_T198	Add1_S436	5.45921	10	Nonresponders	41	P	3.98781e-07
Prkaca_T198	Add1_T610	11.5997	10	Nonresponders	41	P	3.98781e-07
Prkaca_T198	Atp2b1_S1155	4.08864	9	Nonresponders	41	P	3.98781e-07
Prkaca_T198	Atp2b1_S1178	8.07677	9	Nonresponders	41	P	-2.08223e-15
Prkaca_T198	Dnajc5_S10	2.19506	9	Nonresponders	41	P	2.2424e-15
Prkaca_T198	Dnajc5_S12	2.09407	9	Nonresponders	41	P	3.98781e-07
Prkaca_T198	Dnajc5_T11	3.25077	9	Nonresponders	41	P	-3.20343e-16
Prkaca_T198	Map2_S1791	6.91945	11	Nonresponders	41	P	3.98781e-07
Prkaca_T198	Nolc1_S563	8.73685	8	Nonresponders	41	P	3.20343e-16
Prkaca_T198	Nolc1_S701	6.3761	8	Nonresponders	41	P	1.60171e-15
Prkaca_T198	Pde4d_S192	6.37174	12	Nonresponders	41	P	3.98781e-07
Prkaca_T198	Prkar2b_S112	2.9663	11	Nonresponders	41	P	1.28137e-15
Prkaca_T198	Prkar2b_S83	9.33929	11	Nonresponders	41	P	3.98781e-07
Prkaca_T198	Prkar2b_S85	9.37632	11	Nonresponders	41	P	3.98781e-07
Mapk14_S2	Rps6ka4_S745	10.6476	20	Nonresponders	41	P	0.0574279
Mapk14_Y182	Rps6ka4_T687	9.65692	20	Nonresponders	41	P	-0.347432
Src_S17	Araf_S157	4.54499	7	Nonresponders	42	P	1.60171e-15
Pak2_S2	Arhgef6_S663	6.63155	7	Nonresponders	42	P	-0.0625688
Vim_S39	Cd44_S744	2.06482	7	Nonresponders	42	P	-0.00217238
Mapk14_Y182	Cdc25b_S372	14.1721	7	Nonresponders	42	P	-0.347424
Src_S17	Cltc_Y434	14.8227	7	Nonresponders	42	P	-0.216594
Ripk1_S313	Dab2ip_S978	6.38677	7	Nonresponders	42	P	-9.91717e-11
Prkaca_T198	Dmtn_S333	4.34138	7	Nonresponders	42	P	3.98781e-07
PKB308	Eif4ebp1_S111	4.70199	7	Nonresponders	42	P	-0.0161879
Prkcd_S671	Elavl1_S2	6.00591	7	Nonresponders	42	P	6.08651e-15
Casp8_S188	Fas_S208	1.90644	7	Nonresponders	42	P	-7.20906e-11
Casp8_S213	Fas_S222	1.16178	7	Nonresponders	42	P	-2.40026e-11
Src_S17	H2-D1_S337	3.59738	7	Nonresponders	42	P
Prkaca_T198	Hsp90aa1_S231	4.38955	7	Nonresponders	42	P	3.98781e-07
Prkaca_T198	Hsp90aa1_S263	1.62009	7	Nonresponders	42	P	4.4848e-15
Mtor_T2473	Irs1_S408	10.2958	7	Nonresponders	42	D	0.942607
ERK	Ksr1_S320	2.60329	7	Nonresponders	42	P	-0.00354477
ERK	Ksr1_S392	13.7326	7	Nonresponders	42	D	0.280827
ERK	Ksr1_T256	6.69271	7	Nonresponders	42	P	-0.715701
ERK	Ksr1_T260	7.00447	7	Nonresponders	42	P	-0.958898
Dapk1_S319	Mcm3_S668	9.10457	7	Nonresponders	42	P	-0.08973
Dapk1_S319	Mcm3_S672	4.58677	7	Nonresponders	42	P	-3.30576e-11
Snw1_S232	Ncor2_S149	3.23831	7	Nonresponders	42	P	-3.53812e-11
Snw1_S232	Ncor2_S152	3.03978	7	Nonresponders	42	P	9.16436e-12
Snw1_S232	Ncor2_S1600	2.10902	7	Nonresponders	42	P	3.98779e-07
Snw1_S232	Ncor2_S2250	0.583711	7	Nonresponders	42	P	3.98779e-07
Snw1_S232	Ncor2_S550	6.21412	7	Nonresponders	42	P	1.05969e-11
Snw1_S232	Ncor2_S955	7.47466	7	Nonresponders	42	P	8.30008e-12
Snw1_S232	Ncor2_T1385	4.17934	7	Nonresponders	42	P	3.98779e-07
Snw1_S232	Ncor2_T549	6.91297	7	Nonresponders	42	P	-2.18826e-12
Prkaca_T198	Phka1_S982	6.97047	7	Nonresponders	42	P	3.98781e-07
ERK	Pitpnm1_S593	4.42321	7	Nonresponders	42	P	-0.0958239
ERK	Pitpnm1_S621	0.719121	7	Nonresponders	42	P	-0.148713
ERK	Pitpnm1_S664	4.8665	7	Nonresponders	42	P	-0.985347
ERK	Pitpnm1_S667	2.67036	7	Nonresponders	42	P	-0.91924
ERK	Pitpnm1_T665	4.91555	7	Nonresponders	42	P	-0.649689
Prkaca_T198	Plin1_S174	12.1717	7	Nonresponders	42	P	3.98781e-07
Prkaca_T198	Plin1_S384	5.99508	7	Nonresponders	42	P	5.44583e-15
Prkaca_T198	Plin1_S439	0.782226	7	Nonresponders	42	P	9.61028e-16
Prkaca_T198	Plin1_S492	13.4527	7	Nonresponders	42	P	1.60171e-15
Prkaca_T198	Plin1_T443	13.256	7	Nonresponders	42	P	-2.08223e-15
ERK	Polr2a_S1920	1.13624	7	Nonresponders	42	P	-0.26225
Prkaca_T198	Prkar1a_S212	1.71348	7	Nonresponders	42	P	1.60171e-15
Ulk1_S643	Rb1cc1_S237	5.0454	7	Nonresponders	42	P	-0.000787168
Ulk1_S477	Rb1cc1_S257	6.50906	7	Nonresponders	42	P	-1.43703e-11
Ulk1_T665	Rb1cc1_S261	7.49352	7	Nonresponders	42	P	-3.68394e-15
Ulk1_S479	Rb1cc1_T238	3.56926	7	Nonresponders	42	P	-0.00436919
Camk2g_S315	Rrad_S301	7.98893	7	Nonresponders	42	P	0.196564
PKB473	Sh2b2_S106	8.91869	7	Nonresponders	42	D	2.10356e-06
Akt1_S122	Sh2b2_S107	14.778	7	Nonresponders	42	P	1.28137e-15
Prkaca_T198	Slc4a4_S1034	4.28977	7	Nonresponders	42	P	4.4848e-15
Prkaca_T198	Slc4a4_S257	11.6396	7	Nonresponders	42	P	5.44583e-15
Prkaca_T198	Sptbn1_S2137	2.69569	7	Nonresponders	42	P	3.98781e-07
Prkaca_T198	Sptbn1_S2164	3.66389	7	Nonresponders	42	P	3.98781e-07
Prkaca_T198	Sptbn1_S2168	1.65917	7	Nonresponders	42	P	3.98781e-07
Srpk2_S488	Acin1_S1286	9.73972	6	Nonresponders	43	D	0.135409
Srpk2_S488	Acin1_S1288	4.2607	6	Nonresponders	43	D	0.21396
Srpk2_S491	Acin1_S176	1.58456	6	Nonresponders	43	D	-0.0406682
Srpk2_S491	Acin1_S349	1.48488	6	Nonresponders	43	P	4.61165e-12
Srpk2_S488	Acin1_S351	2.22178	6	Nonresponders	43	P	-1.40036e-10
Srpk2_S488	Acin1_S373	10.6329	6	Nonresponders	43	D	0.423477
Srpk2_S488	Acin1_S439	3.90609	6	Nonresponders	43	P	-1.35622e-10
Srpk2_S488	Acin1_S442	5.46318	6	Nonresponders	43	P	-1.33584e-10
Srpk2_S491	Acin1_S451	7.12708	6	Nonresponders	43	P	3.31702e-11
Srpk2_S491	Acin1_S615	4.02019	6	Nonresponders	43	P	5.73285e-12
Srpk2_S491	Acin1_S617	3.75952	6	Nonresponders	43	P	3.31718e-11
Srpk2_S488	Acin1_S689	7.79197	6	Nonresponders	43	P	-1.34675e-10
Srpk2_S488	Acin1_S798	6.71654	6	Nonresponders	43	D	0.151186
Srpk2_S491	Acin1_S963	2.95088	6	Nonresponders	43	P	5.79948e-12
Srpk2_S491	Acin1_T1289	11.486	6	Nonresponders	43	P	4.17663e-12
Srpk2_S488	Acin1_T377	13.5079	6	Nonresponders	43	P	-2.3686e-10
PKB308	Carhsp1_S31	6.31839	6	Nonresponders	43	D	1.15273
PKB473	Carhsp1_S33	1.79945	6	Nonresponders	43	P	0.00119258
Akt1_S126	Carhsp1_S42	5.92047	6	Nonresponders	43	P	-0.0561978
PKB308	Carhsp1_S53	3.12397	6	Nonresponders	43	P	-0.0280766
Src_S17	Cfl1_S3	14.5452	6	Nonresponders	43	P	-0.21659
Rps6ka3_T365	Cic_S20	9.11256	6	Nonresponders	43	P	-0.884054
Mapk14_Y182	Csnk2b_S209	2.67175	6	Nonresponders	43	P	-0.200119
Mtor_S1261	Deptor_S244	4.55737	6	Nonresponders	43	P	0.142891
Pak2_S2	Eif4g1_T214	2.01688	6	Nonresponders	43	P	-0.0625731
Src_S17	Eno1_S254	1.82875	6	Nonresponders	43	P	-2.59719e-09
Mapk14_S2	Fgfr1_Y663	9.69138	6	Nonresponders	43	P	0.0409249
Mapk14_Y182	Khsrp_S182	1.5834	6	Nonresponders	43	P	-2.49008e-09
Prkaca_T198	Ndrg1_S2	9.14721	6	Nonresponders	43	P	3.98781e-07
Prkaca_T198	Ndrg1_S336	5.59816	6	Nonresponders	43	P	3.98781e-07
PKB308	Nr3c1_T159	13.3426	6	Nonresponders	43	P	-0.520743
Mdm2_S163	Numb_S391	12.2214	6	Nonresponders	43	P	0.00258564
PKB308	Pikfyve_S1548	7.66039	6	Nonresponders	43	P	-0.688157
Akt1_S124	Pikfyve_S1753	1.37051	6	Nonresponders	43	P	1.30379e-13
PKB473	Pikfyve_S307	11.1719	6	Nonresponders	43	P	0.0052165
Akt1_S122	Pikfyve_S312	8.09377	6	Nonresponders	43	P	-3.82423e-05
PKB473	Pikfyve_S475	14.5464	6	Nonresponders	43	P	0.00164246
Prkaca_T198	Ppp1r1a_S67	2.39603	6	Nonresponders	43	P	3.98781e-07
PKB308	Rnf11_S14	2.32085	6	Nonresponders	43	P	-0.0113745
Src_S17	Tiam1_S231	5.83262	6	Nonresponders	43	P	-0.117573
PKB473	Vim_S144	3.27447	6	Nonresponders	43	P	0.00441844
PKB473	Vim_S56	11.4013	6	Nonresponders	43	PM	0.00105149
PKB308	Vim_T436	9.49674	6	Nonresponders	43	P	-0.00571408
Raf1_S321	Ywhag_S71	0.718706	6	Nonresponders	43	P	-0.000306338
PKB308	Zfp36l1_S54	8.06672	6	Nonresponders	43	P	-0.427844
Csnk2b_S209	Ctdp1_S502	14.8038	7	Nonresponders	44	P	-0.199985
Csnk2b_S209	Ctdp1_S530	7.36685	7	Nonresponders	44	P	-0.0776456
Csnk2b_S209	Ctdp1_S860	11.2703	7	Nonresponders	44	P	-0.0776456
Csnk2b_S209	Ctdp1_S863	7.98013	7	Nonresponders	44	P	-0.0776456
Csnk2b_S209	Eif5_S387	3.33508	7	Nonresponders	44	P	-0.0511586
Csnk2b_S209	Eif5_S388	3.33511	7	Nonresponders	44	P	-0.051091
ERK	Abi1_S183	5.80627	5	Nonresponders	45	P	-0.322009
Src_S17	Adam12_S848	2.5502	5	Nonresponders	45	P	-0.00854691
Egfr_S1166	Ago2_S825	9.70611	5	Nonresponders	45	P	-0.241535
Prkcd_S671	Bag3_S138	12.7939	5	Nonresponders	45	P	3.84411e-15
Prkcd_S688	Bag3_S179	1.48726	5	Nonresponders	45	P	3.20343e-16
Prkcd_S688	Bag3_S270	8.5343	5	Nonresponders	45	P	3.20343e-15
Prkcd_S669	Bag3_S280	12.1413	5	Nonresponders	45	P	-0.0105099
Prkcd_S688	Bag3_T291	0.938325	5	Nonresponders	45	P	-7.69756e-10
Mapk14_S2	Baz1b_S1464	0.977531	5	Nonresponders	45	P	0.0948937
Mapk14_S2	Baz1b_S1468	6.04847	5	Nonresponders	45	P	0.0931514
Mapk14_Y182	Baz1b_S152	4.41889	5	Nonresponders	45	P	-6.68885e-11
Mapk14_S2	Baz1b_S706	4.37708	5	Nonresponders	45	P	0.0956494
Mapk14_Y182	Baz1b_S709	6.59978	5	Nonresponders	45	P	-1.44154e-15
Pak2_S2	Casp7_S16	2.47138	5	Nonresponders	45	P	-0.0625697
Egfr_S1166	Cblb_S476	2.71305	5	Nonresponders	45	P	-1.585e-10
Egfr_S1166	Cblb_S480	13.6927	5	Nonresponders	45	D	0.511182
Egfr_S1166	Cblb_S521	14.157	5	Nonresponders	45	P	-0.511265
Egfr_S1166	Cblb_S525	8.98235	5	Nonresponders	45	P	-0.511288
Egfr_S1166	Cblb_S529	4.02293	5	Nonresponders	45	P	-0.511292
Brd4_S1154	Cdk9_T186	10.9534	5	Nonresponders	45	P	0.449035
PKB473	Fam129a_S578	7.13298	5	Nonresponders	45	P	0.0228922
Ripk1_S313	Fas_S220	14.9415	5	Nonresponders	45	D	0.180727
Src_S17	Hsp90ab1_S226	5.32667	5	Nonresponders	45	P	-0.138308
Src_S17	Hsp90ab1_S255	1.48833	5	Nonresponders	45	P	-0.216591
Src_S17	Hsp90ab1_S261	1.08071	5	Nonresponders	45	P	-0.166631
Src_S17	Hsp90ab1_S445	4.34795	5	Nonresponders	45	P	-0.125646
PKB308	Ilf3_S495	11.0434	5	Nonresponders	45	D	0.184494
PKB308	Ilf3_T80	13.5954	5	Nonresponders	45	P	-0.0027489
PKB308	Ilk_S232	2.06013	5	Nonresponders	45	P	-0.00980709
Akt1_S124	Impdh2_S416	6.47104	5	Nonresponders	45	P	-0.0411288
Mtor_T2474	Iscu_S15	0.295112	5	Nonresponders	45	P	0.00236333
Mtor_T2473	Iscu_S21	1.09077	5	Nonresponders	45	P	-0.0126128
Gsk3b_Y216	Mark2_S483	14.5791	5	Nonresponders	45	P	-0.00219079
Gsk3b_Y216	Mark2_S514	8.73874	5	Nonresponders	45	P	1.28137e-15
ERK	Mkl1_S407	3.66228	5	Nonresponders	45	P	-0.968624
Prkaca_T198	Nedd4l_S484	7.90845	5	Nonresponders	45	P	0
Prkcd_S688	Pa2g4_S2	5.51697	5	Nonresponders	45	P	-0.018852
Akt1_S126	Palld_S1141	10.1252	5	Nonresponders	45	P	-0.0324991
Akt1_S126	Palld_S1143	8.38209	5	Nonresponders	45	P	-0.0382613
Akt1_S122	Palld_S1146	2.23002	5	Nonresponders	45	P	-0.028915
ERK	Pde4d_S749	4.60341	5	Nonresponders	45	P	-0.133662
Akt1_S124	Phb2_S151	2.94588	5	Nonresponders	45	D	0.0385669
Akt1_S124	Phb2_S293	2.81598	5	Nonresponders	45	P	0.0012919
Akt1_S122	Phb2_S91	3.63152	5	Nonresponders	45	P	1.28137e-15
Egfr_S1166	Plec_S4241	7.09971	5	Nonresponders	45	P	-0.511286
Egfr_S1166	Plec_S4248	8.97353	5	Nonresponders	45	P	-0.511235
Egfr_S1166	Plec_S4472	4.40649	5	Nonresponders	45	P	-1.04604e-10
ERK	Pml_S17	6.95326	5	Nonresponders	45	P	-0.383502
Raf1_S309	Rras2_S186	9.35334	5	Nonresponders	45	P	-0.0353449
PKB308	Slc9a1_S701	10.0556	5	Nonresponders	45	PM	-0.0219519
PKB308	Slc9a1_T699	9.71348	5	Nonresponders	45	PM	0.0313385
Ncor2_S1784	Spen_S1293	6.63287	5	Nonresponders	45	D	-0.00799053
Ncor2_T549	Spen_S749	3.66977	5	Nonresponders	45	P	-9.98953e-05
ERK	Sphk2_S364	12.3978	5	Nonresponders	45	D	0.618657
Ripk1_S313	Sqstm1_T269	0.403258	5	Nonresponders	45	P	-0.158038
PKB473	Srpk2_S10	9.82119	5	Nonresponders	45	P	0.00293396
PKB308	Srpk2_T332	8.27336	5	Nonresponders	45	P	-0.0021232
PKB308	Srpk2_T333	8.44598	5	Nonresponders	45	P	-0.00196399
Srpk2_S491	Srsf1_S199	6.92541	5	Nonresponders	45	P	3.31683e-11
Prkaca_T198	Srsf1_S2	1.85984	5	Nonresponders	45	P	3.84411e-15
Srpk2_S491	Srsf1_S201	3.12589	5	Nonresponders	45	P	-0.134114
Srpk2_S488	Srsf1_S205	2.14806	5	Nonresponders	45	P	-0.321323
Srpk2_S488	Srsf1_S238	14.3889	5	Nonresponders	45	D	0.0420839
ERK	Stim1_S257	3.31351	5	Nonresponders	45	P	-0.863752
ERK	Stim1_S519	4.76903	5	Nonresponders	45	P	-0.475458
ERK	Stim1_S575	8.2344	5	Nonresponders	45	P	-0.868099
Akt1_S122	Stk3_S15	6.81485	5	Nonresponders	45	P	0.00538363
Akt1_S126	Stk3_S316	6.67114	5	Nonresponders	45	P	-0.00586491
Rps6ka3_S369	Tinf2_S352	6.11773	5	Nonresponders	45	P	0.0640818
Egfr_S1166	Tnk2_T517	6.47938	5	Nonresponders	45	D	0.511288
Egfr_S1166	Tnk2_Y827	2.37261	5	Nonresponders	45	P	-1.6029e-10
ERK	Tpr_S2141	2.26114	5	Nonresponders	45	P	-0.524118
Srpk2_S488	U2af2_S2	7.06922	5	Nonresponders	45	P	-1.35605e-10
Srpk2_S491	U2af2_S79	5.16595	5	Nonresponders	45	D	-0.0445448
Csnk2b_S209	Uso1_S940	7.18171	5	Nonresponders	45	P	-0.0776456
Akt1_S122	Vcp_S748	1.23104	5	Nonresponders	45	P	1.28137e-15
PKB473	Zyx_S336	4.18204	5	Nonresponders	45	P	0.322082
Fas_S220	Daxx_T524	10.7198	7	Nonresponders	46	P	0.180712
Ilk_S232	Parva_S4	11.6608	7	Nonresponders	46	D	0.0151408
Ilk_S232	Parva_S8	4.1113	7	Nonresponders	46	P	-0.00810095
Ilk_S232	Parva_T3	14.7064	7	Nonresponders	46	P	3.6391e-06
Ilk_S232	Ppp1r12a_S870	4.96272	9	Nonresponders	46	P	-1.65469e-10
Srpk2_S10	Srsf1_S234	4.59626	5	Nonresponders	46	D	-0.00213164
Cdk9_T186	Supt5h_S664	9.45428	9	Nonresponders	46	P	0.448983
Mark2_S483	Utrn_S933	3.29642	5	Nonresponders	46	P	-0.00219054
Src_S17	Abl2_S632	4.93023	4	Nonresponders	47	P	-0.216595
Egfr_S1166	Anks1a_S636	4.31784	4	Nonresponders	47	P	-0.285018
Egfr_S1166	Anks1a_S642	4.7743	4	Nonresponders	47	D	0.249385
Egfr_S1166	Anks1a_S663	14.9272	4	Nonresponders	47	P	-0.240189
Egfr_S1166	Anks1a_S668	7.90963	4	Nonresponders	47	P	-0.266507
Egfr_S1166	Anks1a_S677	5.74612	4	Nonresponders	47	P	-0.130909
Egfr_S1166	Anks1a_S679	13.1781	4	Nonresponders	47	P	-0.0574998
Egfr_S1166	Apbb2_S334	0.610746	4	Nonresponders	47	P	-1.5857e-14
Ep300_S1037	Apex1_S18	12.7931	4	Nonresponders	47	P	-1.03294e-12
Gab1_S266	Arhgap32_S706	0.489208	4	Nonresponders	47	P	-0.154218
Src_S17	Arhgap5_S1174	14.9734	4	Nonresponders	47	P	-0.216594
Ptk2b_S375	Asap2_S701	2.98985	4	Nonresponders	47	P	3.98776e-07
Egfr_S1166	Atp5c1_S146	1.83847	4	Nonresponders	47	P	-2.35397e-09
ERK	Blvra_S229	2.18596	4	Nonresponders	47	P	-0.212126
S6K	Cad_S1859	3.78349	4	Nonresponders	47	P	-0.172802
Akt1_S129	Cby1_S20	14.8941	4	Nonresponders	47	P	3.58784e-14
Gsk3b_S219	Clasp2_S688	1.43471	4	Nonresponders	47	P	-0.0993878
Gsk3b_S219	Clasp2_S692	3.58124	4	Nonresponders	47	P	-0.0993878
Gsk3b_Y216	Clasp2_S762	3.25925	4	Nonresponders	47	P	0.000694728
Mtor_S2448	Clip1_S146	7.78666	4	Nonresponders	47	D	0.180377
Mtor_T2473	Clip1_S194	2.41893	4	Nonresponders	47	P	-0.22151
Mtor_S2481	Clip1_S199	1.00191	4	Nonresponders	47	P	-0.108981
Mtor_T2473	Clip1_S203	3.13615	4	Nonresponders	47	P	-6.22041e-12
Prkaca_T198	Ctps1_S575	5.4699	4	Nonresponders	47	P	3.98781e-07
Gsk3b_Y216	Dpysl3_T627	2.41693	4	Nonresponders	47	P	-5.76617e-15
Gsk3b_S219	Drosha_S299	2.56171	4	Nonresponders	47	P	-0.167755
Gsk3b_Y216	Drosha_S301	1.90791	4	Nonresponders	47	P	1.60171e-15
Eif4ebp1_T36	Eif4e2_S13	10.5833	4	Nonresponders	47	P	3.20343e-16
Src_S17	Gak_S824	10.4843	4	Nonresponders	47	P	-2.57185e-11
Src_S17	Gak_S827	10.4494	4	Nonresponders	47	P	-9.61028e-16
Mtor_S2478	Gphn_S194	7.39375	4	Nonresponders	47	P	-0.0783399
Prkaca_T198	Hdac5_S269	4.13594	4	Nonresponders	47	P	1.92206e-15
Prkaca_T198	Hdac5_S289	2.57588	4	Nonresponders	47	P	3.98781e-07
PKB473	Lmna_S22	2.2767	4	Nonresponders	47	P	0.0598355
PKB473	Lmna_S277	14.9798	4	Nonresponders	47	P	2.25963e-11
Akt1_S122	Lmna_S301	2.476	4	Nonresponders	47	P	0.000897065
Akt1_S126	Lmna_S390	1.59991	4	Nonresponders	47	P	-6.89538e-12
Akt1_S126	Lmna_S392	8.60296	4	Nonresponders	47	P	-0.0356274
Akt1_S129	Lmna_S458	11.5423	4	Nonresponders	47	P	0.00316527
PKB308	Lmna_S573	1.83351	4	Nonresponders	47	P	-0.381225
PKB308	Lmna_S575	3.50893	4	Nonresponders	47	P	-0.0113941
PKB473	Lmna_S637	6.91553	4	Nonresponders	47	P	0.0109658
Wnk1_S1845	Map3k2_S255	1.38735	4	Nonresponders	47	P	6.40685e-16
Wnk1_S1842	Map3k2_S347	9.60118	4	Nonresponders	47	P	1.26856e-13
Wnk1_S2099	Map3k3_S340	15.1599	4	Nonresponders	47	D	-0.945574
Mapk14_Y182	Map3k7_S439	5.26864	4	Nonresponders	47	D	0.347354
ERK	Marcks_S122	14.8988	4	Nonresponders	47	P	-0.892765
ERK	Marcks_S138	0.842116	4	Nonresponders	47	P	-0.625836
ERK	Marcks_S140	3.38561	4	Nonresponders	47	P	-0.825014
ERK	Marcks_S141	7.5423	4	Nonresponders	47	P	-0.321455
ERK	Marcks_S156	12.3804	4	Nonresponders	47	P	-0.402715
ERK	Marcks_S160	0.469354	4	Nonresponders	47	P	-0.578309
ERK	Marcks_S163	3.94408	4	Nonresponders	47	P	-0.580434
ERK	Marcks_S171	4.73243	4	Nonresponders	47	P	-1.00906
ERK	Marcks_S27	14.845	4	Nonresponders	47	P	-0.803324
ERK	Marcks_T143	9.46416	4	Nonresponders	47	P	-0.629388
Ep300_S1037	Mef2d_S251	2.08565	4	Nonresponders	47	P	-0.00283578
Akt1_S129	Ncor1_S1012	1.95338	4	Nonresponders	47	P	0.00316423
PKB308	Ncor1_S2117	1.60652	4	Nonresponders	47	P	-3.8313e-12
Akt1_S124	Ncor1_S2135	2.77391	4	Nonresponders	47	P	-0.0439905
Akt1_S129	Ncor1_S2199	5.19043	4	Nonresponders	47	P	3.3636e-14
PKB473	Ncor1_S225	6.20381	4	Nonresponders	47	P	0.00118586
PKB473	Ncor1_S2351	9.4021	4	Nonresponders	47	P	0.156041
Akt1_S124	Ncor1_S605	4.00924	4	Nonresponders	47	P	0.00653343
ERK	Ndel1_S194	4.48975	4	Nonresponders	47	P	-0.403984
ERK	Ndel1_S198	7.55331	4	Nonresponders	47	P	-0.404409
ERK	Nup153_S334	3.16568	4	Nonresponders	47	P	-5.73477e-10
PKB473	Prkaca_S339	2.90065	4	Nonresponders	47	P	0.00217916
PKB473	Ranbp3_S146	2.4736	4	Nonresponders	47	P	-0.00131827
PKB308	Ranbp3_S257	2.54976	4	Nonresponders	47	P	-0.0015676
Akt1_S124	Ranbp3_S277	4.51185	4	Nonresponders	47	P	0.00476213
PKB473	Ranbp3_S283	9.40072	4	Nonresponders	47	P	0.00428014
Akt1_S124	Ranbp3_S32	8.65982	4	Nonresponders	47	P	-9.61028e-16
PKB308	Ranbp3_S33	2.32248	4	Nonresponders	47	D	0.0932396
PKB473	Ranbp3_S40	1.5091	4	Nonresponders	47	D	0.169142
PKB308	Rps3_T221	14.6713	4	Nonresponders	47	PM	-0.00886288
ERK	Sh2b1_S126	5.37765	4	Nonresponders	47	P	-0.0508554
Egfr_S1166	Sh2b1_S127	5.50717	4	Nonresponders	47	P	-1.04107e-11
Ptk2b_S375	Sh2d3c_S22	11.5171	4	Nonresponders	47	P	-4.03668e-10
Ptk2b_S375	Sh2d3c_S435	1.49688	4	Nonresponders	47	P	3.98776e-07
Src_S17	Sh3pxd2a_S420	11.8296	4	Nonresponders	47	D	0.216591
Src_S17	Sh3pxd2a_S566	0.580069	4	Nonresponders	47	P	-1.64627e-10
Src_S17	Sh3pxd2a_S592	10.1707	4	Nonresponders	47	P	-4.73371e-10
Src_S17	Sh3pxd2a_S643	3.26886	4	Nonresponders	47	P	-2.61497e-09
Src_S17	Sh3pxd2a_S656	2.38232	4	Nonresponders	47	P	-4.80514e-16
Src_S17	Sh3pxd2a_T256	13.6878	4	Nonresponders	47	P	-0.207024
Hsf1_S303	Sumo1_S2	3.61979	4	Nonresponders	47	P	0.367859
Ripk1_S313	Zfand5_S48	6.70198	4	Nonresponders	47	D	0.206695
Prkaca_S339	Acaca_S25	6.19693	4	Nonresponders	48	D	-0.00217893
Prkaca_S339	Acaca_S52	8.87451	4	Nonresponders	48	P	0.00217892
Prkaca_S339	Add1_S465	1.15403	10	Nonresponders	48	P	0.00190687
Prkaca_S339	Add1_S586	9.41079	10	Nonresponders	48	P	0.00217891
Prkaca_S339	Add1_S724	7.44906	10	Nonresponders	48	P	0.0021789
Prkaca_S339	Apc_S1557	2.9281	9	Nonresponders	48	P	0.00140633
Prkaca_S339	Atp2b1_S1182	7.70841	9	Nonresponders	48	P	0.00217901
Prkaca_S339	Atp2b1_T1165	4.6671	9	Nonresponders	48	P	0.00217885
Abl2_S632	Cat_S21	7.59138	10	Nonresponders	48	P	-0.0169082
Abl2_S632	Cat_S517	2.02824	10	Nonresponders	48	D	0.216496
Prkaca_S339	Hdac5_S620	7.75371	4	Nonresponders	48	D	-0.00217939
Prkaca_S339	Nf2_S518	10.5501	7	Nonresponders	48	P	0.00166435
Prkaca_S339	Nolc1_S626	9.3865	8	Nonresponders	48	PM	3.64356e-05
Prkaca_S339	Phka1_S973	7.6666	7	Nonresponders	48	D	-0.00217869
Prkaca_S339	Plcb3_S1105	14.9069	5	Nonresponders	48	P	0.00217839
Prkaca_S339	Plcb3_S537	15.467	5	Nonresponders	48	P	-0.00819501
Prkaca_S339	Plin1_S126	14.9386	7	Nonresponders	48	D	-0.00217896
Prkaca_S339	Plin1_S460	14.231	7	Nonresponders	48	D	0.00849549
Prkaca_S339	Ptpn12_S550	8.99287	10	Nonresponders	48	P	0.00201262
Prkaca_S339	Ptpn12_S603	5.40933	10	Nonresponders	48	P	0.0021789
Prkaca_S339	Ptpn12_S606	9.37385	10	Nonresponders	48	P	0.00217842
Prkaca_S339	Ptpn12_S608	9.41394	10	Nonresponders	48	P	0.00217891
Prkaca_S339	Sptbn1_S2127	4.55035	7	Nonresponders	48	D	-0.00178331
Raf1_S309	Adcy6_S53	1.421	3	Nonresponders	49	P	-0.158357
Akt1_S122	Ahnak_S116	7.93378	3	Nonresponders	49	P	0.00538596
Akt1_S126	Ahnak_S211	0.671182	3	Nonresponders	49	P	-0.036395
PKB473	Ahnak_S213	1.06692	3	Nonresponders	49	P	-0.136116
PKB473	Ahnak_S217	2.28946	3	Nonresponders	49	P	0.0656269
PKB308	Ahnak_S2948	13.7779	3	Nonresponders	49	P	-1.26311e-12
PKB308	Ahnak_S5099	2.94505	3	Nonresponders	49	P	-0.0143026
Akt1_S126	Ahnak_S5504	8.20415	3	Nonresponders	49	PM	0.0223967
PKB308	Ahnak_S5510	8.26874	3	Nonresponders	49	P	-0.219999
Akt1_S122	Ahnak_S5522	7.33782	3	Nonresponders	49	D	0.0150576
Akt1_S126	Ahnak_S5525	4.9003	3	Nonresponders	49	D	0.0510416
PKB308	Ahnak_S5553	4.62756	3	Nonresponders	49	P	-1.04692
Akt1_S129	Ahnak_S5555	10.9968	3	Nonresponders	49	P	0.00316363
PKB308	Ahnak_S5557	13.9905	3	Nonresponders	49	P	-0.447464
Akt1_S124	Ahnak_S5563	15.0779	3	Nonresponders	49	P	-1.92206e-15
Akt1_S124	Ahnak_S5607	14.0617	3	Nonresponders	49	P	0.00736614
PKB473	Ahnak_T496	1.93752	3	Nonresponders	49	P	0.00967321
PKB308	Ahnak_T5567	4.47129	3	Nonresponders	49	P	-0.434612
Asap1_S854	Arf1_S147	6.09028	3	Nonresponders	49	P	3.98781e-07
Prkaca_S339	Arfgef1_S1076	4.38401	3	Nonresponders	49	P	1.92206e-15
Prkaca_T198	Arfgef1_S1566	0.907699	3	Nonresponders	49	P	5.76617e-15
Mtor_S1261	Bag3_S274	6.71582	3	Nonresponders	49	D	-0.095127
Mtor_T2473	Bag3_S281	13.1536	3	Nonresponders	49	D	0.109625
Mtor_S2481	Bag3_S285	11.9342	3	Nonresponders	49	D	0.0700726
Mtor_T2473	Bag3_S360	1.71681	3	Nonresponders	49	P	-0.389312
Mtor_S1261	Bag3_S390	1.54036	3	Nonresponders	49	D	-0.103545
Gsk3b_Y216	Bclaf1_S177	3.93358	3	Nonresponders	49	P	5.16091e-11
Gsk3b_Y216	Bclaf1_S196	4.13292	3	Nonresponders	49	P	-0.00119656
Gsk3b_S219	Bclaf1_S198	4.35314	3	Nonresponders	49	P	-4.49281e-13
Gsk3b_Y216	Bclaf1_S267	4.10087	3	Nonresponders	49	P	9.61028e-16
Gsk3b_Y216	Bclaf1_S284	1.68828	3	Nonresponders	49	P	-0.000439857
Gsk3b_Y216	Bclaf1_S289	5.22798	3	Nonresponders	49	P	1.28137e-15
Gsk3b_S219	Bclaf1_S387	9.49469	3	Nonresponders	49	P	-0.0993878
Gsk3b_S219	Bclaf1_S395	10.255	3	Nonresponders	49	P	-0.0993878
Gsk3b_Y216	Bclaf1_S494	1.56923	3	Nonresponders	49	P	-1.60171e-16
Gsk3b_S219	Bclaf1_S510	4.42094	3	Nonresponders	49	P	-0.0993878
Gsk3b_Y216	Bclaf1_S529	7.51907	3	Nonresponders	49	P	-4.64497e-15
Gsk3b_Y216	Bclaf1_S656	8.13481	3	Nonresponders	49	P	1.92206e-15
Gsk3b_Y216	Bclaf1_T256	1.33051	3	Nonresponders	49	P	0.000694733
Src_S17	Bcr_S461	10.5111	3	Nonresponders	49	P	9.61028e-16
Fgfr1_Y663	Bnip2_S114	4.08359	3	Nonresponders	49	P	0.0303569
ERK	Canx_S553	1.191	3	Nonresponders	49	P	-0.0663202
ERK	Canx_S563	10.5527	3	Nonresponders	49	P	-0.0526422
ERK	Canx_S582	1.03129	3	Nonresponders	49	P	-0.0908118
ERK	Canx_T561	11.3186	3	Nonresponders	49	P	-0.0942718
Trim28_S473	Cbx1_S89	5.85381	3	Nonresponders	49	P	0.00258445
Trim28_S473	Cbx1_S91	4.09492	3	Nonresponders	49	P	0.00473379
Cdk9_T186	Ccnk_S325	3.73957	3	Nonresponders	49	P	0.198467
Cdk9_T186	Ccnk_S329	1.07872	3	Nonresponders	49	P	0.339844
Cdk9_T186	Ccnk_S341	2.70292	3	Nonresponders	49	P	0.139375
Prkaca_T198	Chchd3_S50	7.07079	3	Nonresponders	49	P	3.98781e-07
Mark2_S514	Crtc2_S612	13.6511	3	Nonresponders	49	P	9.61028e-16
Egfr_S1166	Ctnna1_S652	2.23622	3	Nonresponders	49	P	-0.511284
Mllt4_S1179	Ctnna1_T654	8.84102	3	Nonresponders	49	P	3.9878e-07
Egfr_S1166	Ctnna1_T658	2.87015	3	Nonresponders	49	D	0.0802658
PKB473	Dab2ip_S747	8.05745	3	Nonresponders	49	P	0.0157059
Camk2g_S315	Dlg1_S144	0.956294	3	Nonresponders	49	P	0.00455102
Camk2g_S315	Dlg1_S573	7.81737	3	Nonresponders	49	P	0.196572
Camk2g_S315	Dlg1_S688	6.26024	3	Nonresponders	49	P	0.00110294
Camk2g_S315	Dlg1_S710	1.59219	3	Nonresponders	49	P	0.106065
Src_S17	Dock1_S1858	6.50793	3	Nonresponders	49	P	1.28137e-15
ERK	Dyrk1b_Y333	2.56998	3	Nonresponders	49	P	-0.480374
PKB473	Edc3_S131	9.07788	3	Nonresponders	49	P	0.0717596
PKB473	Edc3_S161	3.98129	3	Nonresponders	49	P	0.01876
Eif5_S388	Eif2s2_S2	7.57111	3	Nonresponders	49	P	-0.0510803
Casp8_S213	Eif4g1_S1096	12.2891	1	Responders	49	D	-0.0197371
ERK	Eif4g1_S1096	12.2891	1	Responders	49	PM	-0.0197371
Src_S17	Farp2_S1043	1.76347	3	Nonresponders	49	P	-0.214026
Src_S17	G3bp1_S149	9.81095	3	Nonresponders	49	P	1.28137e-15
Src_S17	G3bp1_S231	2.96381	3	Nonresponders	49	P	-0.0360803
Prkaca_S339	Gfpt1_S259	7.41508	3	Nonresponders	49	P	-2.2424e-15
ERK	Gorasp1_T216	5.45609	3	Nonresponders	49	D	0.373901
Nr3c1_T159	Hdac1_S421	5.6779	3	Nonresponders	49	P	-1.53414e-10
Nr3c1_T159	Hdac1_S423	3.87314	3	Nonresponders	49	P	-0.193223
Prkcd_S688	Hmga1_S101	8.68209	3	Nonresponders	49	P	-1.83049e-10
Prkcd_S688	Hmga1_S102	8.68209	3	Nonresponders	49	P	1.28137e-15
Prkaca_S339	Igf2r_S2401	3.10396	3	Nonresponders	49	P	-0.00175241
Prkaca_S339	Immt_S106	9.97747	3	Nonresponders	49	P	0.00217891
Prkaca_S339	Immt_S34	3.13272	3	Nonresponders	49	P	0.00175492
PKB308	Itpr1_S1573	2.24937	3	Nonresponders	49	D	0.412748
Mdm2_S183	Jmy_S704	12.2726	3	Nonresponders	49	D	-0.0487587
Gsk3b_Y216	Kdm1a_S132	3.0938	3	Nonresponders	49	P	4.4848e-15
Gsk3b_S219	Kdm1a_S138	2.94977	3	Nonresponders	49	P	-2.28856e-09
Gsk3b_S219	Kdm1a_S167	8.7863	3	Nonresponders	49	P	-0.172498
Gsk3b_Y216	Klc2_S578	5.2036	3	Nonresponders	49	P	-3.20343e-15
Gsk3b_Y216	Klc2_S579	3.65292	3	Nonresponders	49	P	1.67667e-12
Braf_S766	Ksr1_S297	11.7507	3	Nonresponders	49	D	0.00362901
ERK	Lima1_S230	13.6617	3	Nonresponders	49	P	-0.379081
Egfr_S1166	Lrig1_S1066	1.61141	3	Nonresponders	49	P	-0.3538
Egfr_S1166	Lrig1_S1067	2.20093	3	Nonresponders	49	P	-0.264013
Prkaca_T198	Lrrk2_S935	3.98499	3	Nonresponders	49	P	9.61028e-16
Map3k7_S439	Map4k4_S514	13.2217	3	Nonresponders	49	D	-0.28995
Map3k7_S439	Map4k4_S543	0.520701	3	Nonresponders	49	P	0.0280904
Map3k7_S439	Map4k4_S545	7.25359	3	Nonresponders	49	P	0.0280879
Map3k7_S439	Map4k4_S577	0.520701	3	Nonresponders	49	P	0.0280877
Map3k7_S439	Map4k4_S579	7.25359	3	Nonresponders	49	P	0.0280912
Map3k7_S439	Map4k4_S753	8.5779	3	Nonresponders	49	D	-0.303516
Map3k7_S439	Map4k4_S757	8.34401	3	Nonresponders	49	D	-0.277528
Pak2_S2	Mapk6_S189	4.6567	3	Nonresponders	49	P	-2.54557e-10
Pak2_S2	Mapk6_S386	4.56817	3	Nonresponders	49	P	-6.04685e-10
Pak2_S2	Mapk6_T389	4.56817	3	Nonresponders	49	P	-1.37021e-09
ERK	Ncoa2_S493	7.39912	3	Nonresponders	49	P	-0.267459
PKB308	Ndrg2_S332	14.1678	3	Nonresponders	49	P	-0.088905
PKB308	Ndrg2_T348	3.73699	3	Nonresponders	49	P	-0.115884
Prkcd_S669	Npm1_S70	12.1194	3	Nonresponders	49	D	0.119118
Nr3c1_T159	Nr3c2_S250	2.47581	3	Nonresponders	49	D	0.253818
ERK	Nup214_S1139	12.073	3	Nonresponders	49	P	-1.6813e-10
Gsk3b_Y216	Otud7b_S467	5.93344	3	Nonresponders	49	P	-1.60171e-15
PKB473	Pcbp1_S173	1.0585	3	Nonresponders	49	P	0.0189925
PKB473	Pcbp1_S190	4.97072	3	Nonresponders	49	P	0.0012274
ERK	Pcyt1a_S315	2.26049	3	Nonresponders	49	P	-1.81616e-10
ERK	Pcyt1a_S343	2.43819	3	Nonresponders	49	P	-1.68181e-10
ERK	Pcyt1a_S347	5.56819	3	Nonresponders	49	D	0.639834
Pdpk1_S244	Pdha1_S293	14.2435	3	Nonresponders	49	P	-0.119131
Pdpk1_S244	Pdha1_S295	7.78655	3	Nonresponders	49	P	-0.119123
Pdpk1_S244	Pdha1_S300	1.18143	3	Nonresponders	49	P	-0.119128
Raf1_S309	Phb_S151	3.78865	3	Nonresponders	49	P	-0.0572303
Ptk2b_S375	Pitpnm2_S316	3.43869	3	Nonresponders	49	P	-4.53595e-10
Ptk2b_S375	Pitpnm2_S321	6.98056	3	Nonresponders	49	P	3.98776e-07
Ptk2b_S375	Pitpnm2_S586	12.3596	3	Nonresponders	49	P	3.98776e-07
Araf_S157	Prpf6_T275	3.28443	3	Nonresponders	49	P	5.76617e-15
Casp8_S188	Psen2_S52	1.219	3	Nonresponders	49	P	-7.14025e-11
Src_S17	Ptpn2_S298	14.7807	3	Nonresponders	49	P	-0.216587
Raf1_S259	Rbl2_S1108	1.66411	3	Nonresponders	49	P	-0.0502536
Raf1_S321	Rbl2_S37	6.68075	3	Nonresponders	49	P	-0.00032284
PKB473	Rgcc_S91	9.58892	3	Nonresponders	49	P	0.00175656
Mtor_S2481	Rragc_S11	3.42932	3	Nonresponders	49	D	0.0716455
Mtor_T2474	Rragc_S15	3.28216	3	Nonresponders	49	P	0.0593993
Mtor_T2473	Rragc_S2	5.99868	3	Nonresponders	49	P	-0.486817
Mtor_S2454	Rragc_S384	5.66169	3	Nonresponders	49	P	0.0173867
Mtor_S2454	Rragc_S94	3.34921	3	Nonresponders	49	D	-0.00676227
Mtor_S2454	Rragc_T12	2.72496	3	Nonresponders	49	D	-0.0124362
Mtor_T2473	Rragc_T95	2.76213	3	Nonresponders	49	D	0.138789
Pak2_S2	Sh3kbp1_S183	2.48383	3	Nonresponders	49	P	-0.0531022
PKB473	Sik2_S342	7.31361	3	Nonresponders	49	P	0.00288928
Akt2_S126	Sik2_S343	12.9515	3	Nonresponders	49	P	-0.116397
PKB308	Sik2_S358	5.72694	3	Nonresponders	49	P	-0.0135758
PKB473	Sik2_S534	14.0179	3	Nonresponders	49	P	0.00283689
PKB473	Sik2_S587	11.8795	3	Nonresponders	49	P	1.82884e-11
PKB473	Sik2_T484	5.65956	3	Nonresponders	49	D	-0.0270812
Src_S17	Slc25a4_S149	3.94105	3	Nonresponders	49	P	-0.216582
Src_S17	Slc25a4_S42	9.94606	3	Nonresponders	49	P	2.88308e-15
PKB308	Slc2a4_S488	1.84579	3	Nonresponders	49	P	-0.0060205
Ncoa1_S702	Smarcc1_S327	4.22366	3	Nonresponders	49	P	0.370327
PKB473	Smarcc1_S329	11.1806	3	Nonresponders	49	P	3.07209e-13
Akt1_S124	Smarcc1_S821	5.71136	3	Nonresponders	49	P	6.85629e-12
Akt1_S126	Smarcc1_S824	8.72422	3	Nonresponders	49	D	0.0347195
Gsk3b_Y216	Smarcc2_S302	1.48561	3	Nonresponders	49	P	1.92206e-15
Gsk3b_S219	Smarcc2_S304	1.21958	3	Nonresponders	49	P	-0.172572
Gsk3b_Y216	Smarcc2_S347	5.06096	3	Nonresponders	49	P	1.92206e-15
Gsk3b_S219	Smarcc2_S813	4.73025	3	Nonresponders	49	D	0.136512
Mapk14_S2	Spag9_S245	13.619	3	Nonresponders	49	D	-0.44057
Mapk14_Y182	Spag9_S245	13.619	3	Nonresponders	49	PM	-0.44057
Mapk14_Y182	Spag9_S718	6.26873	3	Nonresponders	49	P	-0.347433
Cfl1_S3	Ssh1_S929	2.18607	3	Nonresponders	49	P	-0.123557
ERK	Tgs1_S152	0.415051	3	Nonresponders	49	P	-0.246965
Ptk2b_S375	Tln1_S2040	5.03975	3	Nonresponders	49	P	3.98776e-07
ERK	Tnks1bp1_S1063	1.94442	3	Nonresponders	49	P	-0.404984
ERK	Tnks1bp1_S1136	10.8642	3	Nonresponders	49	P	-0.48929
ERK	Tnks1bp1_S1241	8.25147	3	Nonresponders	49	P	-0.792475
ERK	Tnks1bp1_S1290	7.33644	3	Nonresponders	49	P	-0.679978
ERK	Tnks1bp1_S1373	0.943998	3	Nonresponders	49	P	-0.258312
ERK	Tnks1bp1_S1375	2.82974	3	Nonresponders	49	P	-0.934268
ERK	Tnks1bp1_S1611	2.88142	3	Nonresponders	49	P	-0.0484062
ERK	Tnks1bp1_S1612	7.04435	3	Nonresponders	49	P	-0.0508554
ERK	Tnks1bp1_S602	13.47	3	Nonresponders	49	P	-0.430547
ERK	Tnks1bp1_S713	6.91999	3	Nonresponders	49	P	-0.0471548
ERK	Tnks1bp1_S796	4.7639	3	Nonresponders	49	P	-0.310062
ERK	Tnks1bp1_S866	7.70478	3	Nonresponders	49	P	-0.410168
ERK	Tnks1bp1_S871	2.00429	3	Nonresponders	49	P	-0.309842
ERK	Tnks1bp1_T238	0.312999	3	Nonresponders	49	P	-0.467668
ERK	Tnks1bp1_T533	13.8991	3	Nonresponders	49	P	-0.00354477
ERK	Ubr5_S2486	5.11977	3	Nonresponders	49	P	-0.716531
PKB473	Usp4_S675	5.11248	3	Nonresponders	49	P	0.00148502
PKB308	Usp4_S680	9.62565	3	Nonresponders	49	P	-1.21378e-12
Egfr_S1166	Usp8_S164	3.69075	3	Nonresponders	49	P	-0.385232
Egfr_S1166	Usp8_S691	8.83249	3	Nonresponders	49	P	-0.111307
Gsk3b_Y216	Vdac1_S117	12.531	3	Nonresponders	49	P	3.20343e-16
Sqstm1_T269	Wdfy3_S3317	2.30814	3	Nonresponders	49	P	-1.34452e-10
Srpk2_S491	Zranb2_S130	3.2657	3	Nonresponders	49	P	0.000225358
Srpk2_S10	Zranb2_S163	3.82662	3	Nonresponders	49	P	2.2424e-15
Srpk2_S488	Zranb2_S191	10.0381	3	Nonresponders	49	D	0.141415
Srpk2_S488	Zranb2_S198	1.01928	3	Nonresponders	49	P	-0.0257338
Srpk2_T332	Zranb2_S203	4.17289	3	Nonresponders	49	P	-2.40257e-15
Srpk2_S491	Zranb2_S303	2.85196	3	Nonresponders	49	P	-0.130297
Srpk2_T332	Zranb2_S304	2.51034	3	Nonresponders	49	P	-0.00212296
Ssh1_S929	Cfl2_S3	7.18811	3	Nonresponders	50	P	-0.123542
Bcr_S461	Mllt4_S1114	0.66801	9	Nonresponders	50	P	3.98781e-07
Bcr_S461	Mllt4_S1282	13.6368	9	Nonresponders	50	P	3.20343e-16
Lrrk2_S935	Msn_S576	4.80414	7	Nonresponders	50	P	3.98866e-10
Lrrk2_S935	Rab10_T73	8.38114	3	Nonresponders	50	P	3.98928e-10
Lrrk2_S935	Rab8a_S181	2.39452	3	Nonresponders	50	P	3.99241e-10
Lrrk2_S935	Rab8a_S185	3.73947	3	Nonresponders	50	P	3.99068e-10
Lrrk2_S935	Rab8a_S186	7.00188	3	Nonresponders	50	P	3.98878e-10
Dyrk1b_Y333	Sf3b1_S129	6.34183	6	Nonresponders	50	P	-0.0906324
Dyrk1b_Y333	Sf3b1_T142	2.18275	6	Nonresponders	50	P	-0.419085
Dyrk1b_Y333	Sf3b1_T207	2.29052	6	Nonresponders	50	P	-0.396976
Dyrk1b_Y333	Sf3b1_T211	2.15061	6	Nonresponders	50	P	-0.403656
Dyrk1b_Y333	Sf3b1_T223	1.96103	6	Nonresponders	50	P	-0.0461727
Dyrk1b_Y333	Sf3b1_T227	5.07508	6	Nonresponders	50	P	-0.0493103
Dyrk1b_Y333	Sf3b1_T244	2.30096	6	Nonresponders	50	P	-0.0476581
Dyrk1b_Y333	Sf3b1_T248	1.9353	6	Nonresponders	50	P	-0.0476085
Dyrk1b_Y333	Sf3b1_T257	1.89228	6	Nonresponders	50	P	-0.0448626
Dyrk1b_Y333	Sf3b1_T261	2.2795	6	Nonresponders	50	P	-0.0449283
Dyrk1b_Y333	Sf3b1_T267	5.23029	6	Nonresponders	50	P	-0.480323
Dyrk1b_Y333	Sf3b1_T273	8.07892	6	Nonresponders	50	P	-0.0497674
Dyrk1b_Y333	Sf3b1_T278	7.34931	6	Nonresponders	50	P	-0.044892
Dyrk1b_Y333	Sf3b1_T326	13.4477	6	Nonresponders	50	P	-0.0491389
Gsk3b_S219	Abi2_S177	14.4396	2	Nonresponders	51	P	-0.164563
Src_S17	Adrb3_S247	0.55569	2	Nonresponders	51	P	-0.118262
Src_S17	Adrb3_S383	0.367348	2	Nonresponders	51	P	-0.105481
Cdk9_T186	Aff4_S175	1.92519	2	Nonresponders	51	P	0.0543127
Prkaca_S339	Akap12_S489	1.49579	2	Nonresponders	51	P	0.00171494
Prkaca_S339	Akap12_S584	6.52745	2	Nonresponders	51	P	0.00217875
Prkaca_T198	Akap12_S598	5.6678	2	Nonresponders	51	P	3.98781e-07
Prkaca_T198	Akap12_S682	14.8659	2	Nonresponders	51	P	3.98781e-07
Prkaca_T198	Akap12_S684	10.1769	2	Nonresponders	51	P	5.12548e-15
Src_S17	Akap8_S320	2.90162	2	Nonresponders	51	D	0.179749
Src_S17	Akap8_S325	2.90165	2	Nonresponders	51	D	0.179682
Src_S17	Akap8_S336	1.59498	2	Nonresponders	51	D	0.148841
Prkaca_S339	Akap8l_S284	6.29464	2	Nonresponders	51	D	-0.00217892
Fgfr1_Y663	Amotl2_S217	13.3389	2	Nonresponders	51	P	0.00315399
Mtor_S2481	Ankrd17_S1631	8.05651	2	Nonresponders	51	P	-0.119473
Mtor_S2454	Ankrd17_S2041	4.98724	2	Nonresponders	51	P	0.0275785
Mtor_T2474	Ankrd17_S2043	2.65063	2	Nonresponders	51	D	0.00812198
Mtor_S2478	Ankrd17_S2055	3.33431	2	Nonresponders	51	P	-0.02919
Gak_S827	Ap1m1_T152	8.67333	2	Nonresponders	51	P	3.98781e-07
Prkaca_T198	Arhgap17_S739	9.60052	2	Nonresponders	51	P	2.88308e-15
Prkaca_T198	Arhgap17_T736	9.55669	2	Nonresponders	51	P	-3.20343e-16
Arhgef2_S951	Arhgap1_S87	1.58595	2	Nonresponders	51	P	-0.0231919
Arhgef12_S638	Arhgap1_S91	1.71772	2	Nonresponders	51	P	-0.239004
Ptk2b_S375	Arhgap21_S1119	4.9561	2	Nonresponders	51	P	-4.61085e-10
Ptk2b_S375	Arhgap21_S482	5.10769	2	Nonresponders	51	P	-5.13034e-10
Arhgef7_S717	Arhgef12_S1390	4.16601	2	Nonresponders	51	P	-1.21056e-10
Camk2d_S315	Atp2a2_S663	1.25762	2	Nonresponders	51	P	0.070339
Src_S17	Atxn2l_S337	6.68303	2	Nonresponders	51	P	-4.7917e-11
Cdk16_S110	Bag6_S986	2.78154	2	Nonresponders	51	P	0.350826
Cdk16_S110	Bag6_T985	0.829045	2	Nonresponders	51	P	0.350565
Casp8_S213	Bcap31_S240	5.66602	2	Nonresponders	51	PM	-0.213982
Src_S17	Bclaf1_T400	14.6899	2	Nonresponders	51	D	0.210529
Gsk3b_S219	Bicd2_S578	2.62263	2	Nonresponders	51	P	-0.164545
Mtor_T2474	Brd9_S103	2.12445	2	Nonresponders	51	P	4.4848e-13
PKB473	C2cd5_S659	4.67858	2	Nonresponders	51	D	0.0634865
PKB473	C2cd5_S661	11.6054	2	Nonresponders	51	P	0.00669643
PKB473	C2cd5_S662	2.35334	2	Nonresponders	51	P	0.00264116
ERK	Calcoco1_S11	10.1	2	Nonresponders	51	P	-1.035
Cdk16_S110	Ccny_S324	2.18099	2	Nonresponders	51	P	6.25506e-10
Cdk16_S110	Ccny_S326	1.09672	2	Nonresponders	51	P	0.0188027
ERK	Cdc42ep1_S121	13.6962	2	Nonresponders	51	P	-1.68129e-10
ERK	Cdc42ep1_S207	6.05374	2	Nonresponders	51	P	-0.0471556
ERK	Cdc42ep1_S332	12.2003	2	Nonresponders	51	P	-0.847678
ERK	Cdc42ep1_S368	3.63234	2	Nonresponders	51	D	0.41336
Mdm2_S163	Cdkn2aip_S169	2.63036	2	Nonresponders	51	P	-0.0279781
Src_S17	Celf2_S27	0.226557	2	Nonresponders	51	P	-0.170793
Clasp2_S688	Clip2_S205	9.95937	2	Nonresponders	51	P	-0.010609
Clasp2_S692	Clip2_S208	2.77428	2	Nonresponders	51	P	-0.0992432
Clasp2_S692	Clip2_S212	3.0221	2	Nonresponders	51	P	-0.0992423
Clasp2_S762	Clip2_S924	5.50899	2	Nonresponders	51	P	-0.00109316
ERK	Clk3_S173	2.33148	2	Nonresponders	51	P	-0.13833
ERK	Clk3_S175	4.57987	2	Nonresponders	51	P	-0.355761
ERK	Clk3_S197	2.38534	2	Nonresponders	51	P	-0.0508554
ERK	Clk3_S199	3.47143	2	Nonresponders	51	P	-1.68174e-10
ERK	Clk3_S224	10.2369	2	Nonresponders	51	P	-0.0166403
ERK	Clk3_S226	9.47141	2	Nonresponders	51	P	-0.00528054
ERK	Clk3_S283	9.4227	2	Nonresponders	51	D	0.0886343
Prkaca_T198	Csnk1d_S328	2.62041	2	Nonresponders	51	P	3.98781e-07
Prkaca_S339	Csnk1d_S331	2.64174	2	Nonresponders	51	P	0.000658754
Mtor_S2454	Cycs_T29	3.38674	2	Nonresponders	51	P	0.00011806
Ilk_S232	Ddx20_S673	4.48667	2	Nonresponders	51	P	-0.00200641
Ilk_S232	Ddx20_S678	0.677772	2	Nonresponders	51	P	-0.00468128
Ilk_S232	Ddx20_S679	3.22539	2	Nonresponders	51	P	-0.00352131
Ctnna1_S652	Dlg1_S575	15.0132	2	Nonresponders	51	D	0.511202
ERK	Dmtn_S226	0.340879	2	Nonresponders	51	D	0.240083
ERK	Dync1li1_S510	3.78846	2	Nonresponders	51	P	-0.544786
Pdpk1_S244	Eef1d_S133	1.1412	2	Nonresponders	51	P	-0.0687157
Pdpk1_S244	Eef1d_S162	1.64011	2	Nonresponders	51	P	2.56274e-15
Pdpk1_S244	Eef1d_T147	6.01004	2	Nonresponders	51	P	-0.119131
Rptor_S859	Eif3b_S120	1.133	2	Nonresponders	51	P	0.0203766
Mtor_S1261	Eif3b_S123	2.12798	2	Nonresponders	51	P	0.0363725
Mtor_S2481	Eif3b_S68	12.749	2	Nonresponders	51	P	-2.75341e-11
Mtor_S2454	Eif3b_S75	14.7461	2	Nonresponders	51	D	0.175522
Mtor_T2473	Eif3b_S75	14.7461	2	Nonresponders	51	D	0.175522
Mtor_T2473	Eif3b_S79	6.92825	2	Nonresponders	51	P	-7.05362e-12
Mtor_S2448	Eif3b_S90	2.76581	2	Nonresponders	51	P	-0.20233
Mtor_T2474	Eif4ebp2_S65	4.45419	2	Nonresponders	51	P	0.0082561
Mtor_T2474	Eif4ebp2_T70	9.93605	2	Nonresponders	51	P	-0.00348674
ERK	Eif4enif1_S563	4.37128	2	Nonresponders	51	P	-0.0639474
S6K	Eif4enif1_S73	5.2881	2	Nonresponders	51	D	0.200108
Pdpk1_S244	Eif4enif1_S77	3.98393	2	Nonresponders	51	P	-0.11913
Prkaca_T198	Eif4enif1_S949	4.14242	2	Nonresponders	51	P	3.98781e-07
Pdcd4_S457	Eif4g1_S1146	10.093	2	Nonresponders	51	P	0.0133743
Pdcd4_S76	Eif4g1_S1147	4.21247	2	Nonresponders	51	P	0.0130023
Pdcd4_S76	Eif4g1_S1211	3.7036	2	Nonresponders	51	D	-0.294601
Src_S17	Evl_S335	3.21455	2	Nonresponders	51	P	-0.216586
Akt1_S122	Faf1_S269	3.44015	2	Nonresponders	51	P	0.00297455
Akt1_S122	Faf1_S581	11.667	2	Nonresponders	51	P	0.00522074
Src_S17	Fermt2_S159	5.33435	2	Nonresponders	51	P	-0.0396479
Src_S17	Fermt2_S339	3.53222	2	Nonresponders	51	P	-0.21658
Src_S17	Fhod1_S514	7.43061	2	Nonresponders	51	P	-0.11426
Mapk14_Y182	Fkbp8_S287	0.798551	2	Nonresponders	51	P	-0.252374
Src_S17	Fundc1_S13	7.06216	2	Nonresponders	51	P	-2.96435e-11
Klc2_S578	Fyco1_T372	2.64532	2	Nonresponders	51	P	1.28137e-15
ERK	Gigyf2_S161	9.809	2	Nonresponders	51	P	-0.00343296
ERK	Gigyf2_S237	4.12085	2	Nonresponders	51	P	-0.256765
ERK	Gigyf2_T383	5.20949	2	Nonresponders	51	P	-0.380619
Ptpn12_S550	Git2_S359	11.06	2	Nonresponders	51	P	0.00201237
Ptpn12_S603	Git2_S393	12.9518	2	Nonresponders	51	P	0.00204159
Casp7_S16	Golga3_S735	3.22056	2	Nonresponders	51	P	-0.0383996
Rps6ka3_S715	H2afx_S137	8.59438	2	Nonresponders	51	P	-0.388856
Rps6ka3_S715	H2afx_S140	6.29089	2	Nonresponders	51	P	-0.398604
Akt1_S126	Hirip3_S134	11.8513	2	Nonresponders	51	P	-0.032499
Akt1_S124	Hirip3_S292	1.32898	2	Nonresponders	51	P	0.000728967
Akt1_S126	Hirip3_S295	1.57169	2	Nonresponders	51	P	-4.06492e-11
Akt1_S129	Hirip3_S296	1.57163	2	Nonresponders	51	P	0.00316528
Akt1_S122	Hirip3_T135	2.8018	2	Nonresponders	51	P	-0.0348087
Akt1_S126	Hirip3_T141	11.4038	2	Nonresponders	51	P	9.61028e-16
Prkaca_S339	Hlcs_S124	2.52751	2	Nonresponders	51	D	-0.00217881
Cdk9_T186	Htatsf1_S441	2.62764	2	Nonresponders	51	P	0.0449912
Cdk9_T186	Htatsf1_S446	1.90356	2	Nonresponders	51	P	0.337799
Cdk9_T186	Htatsf1_S528	3.90844	2	Nonresponders	51	P	0.0543147
Cdk9_T186	Htatsf1_S578	3.76686	2	Nonresponders	51	P	0.0543147
Cdk9_T186	Htatsf1_S598	6.21427	2	Nonresponders	51	P	0.347961
Cdk9_T186	Htatsf1_S613	9.02203	2	Nonresponders	51	P	0.0543147
Cdk9_T186	Htatsf1_S645	1.45321	2	Nonresponders	51	P	0.0543147
Cdk9_T186	Htatsf1_S679	0.776148	2	Nonresponders	51	P	0.34716
Cdk9_T186	Htatsf1_S697	10.483	2	Nonresponders	51	P	0.0543147
Cdk9_T186	Htatsf1_S705	14.4753	2	Nonresponders	51	P	0.0543147
Cdk9_T186	Htatsf1_S724	5.81308	2	Nonresponders	51	P	0.0543147
Cdk9_T186	Htatsf1_T595	9.41974	2	Nonresponders	51	D	-0.292579
Ctnnb1_S552	Igf2bp1_S181	2.05472	2	Nonresponders	51	P	-0.00101719
S6K	Irf3_S130	2.6861	2	Nonresponders	51	D	0.375116
Prkaca_T198	Irf3_S131	9.34322	2	Nonresponders	51	P	4.16445e-15
S6K	Irf3_S135	2.02717	2	Nonresponders	51	P	-0.0163847
Irs1_S887	Irs2_S1089	2.78099	2	Nonresponders	51	P	0.0387643
Irs1_S1134	Irs2_S1138	12.7375	2	Nonresponders	51	PM	0.00867258
Irs1_S1095	Irs2_S1165	1.27604	2	Nonresponders	51	P	-0.0998895
Irs1_S408	Irs2_S556	7.93329	2	Nonresponders	51	D	-0.252042
Irs1_S3	Irs2_S727	9.44831	2	Nonresponders	51	P	0.00445362
Irs1_S1134	Irs2_S965	3.08669	2	Nonresponders	51	P	-0.484175
Irs1_S343	Irs2_T517	3.59136	2	Nonresponders	51	P	-0.0526306
Irs1_S526	Irs2_T524	11.0565	2	Nonresponders	51	P	-0.118052
Camk2d_T287	Itpr2_S1709	15.3973	2	Nonresponders	51	P	-0.0246443
Mtor_S2454	Larp1_S302	9.41526	2	Nonresponders	51	P	6.05127e-12
Mtor_S2481	Larp1_S494	8.8728	2	Nonresponders	51	P	-1.75192e-11
Mtor_S2448	Larp1_S604	7.40183	2	Nonresponders	51	P	-7.43429e-11
Mtor_T2474	Larp1_S608	2.76531	2	Nonresponders	51	P	1.36979e-12
Mtor_S1261	Larp1_S743	4.55114	2	Nonresponders	51	D	-0.326203
Mtor_S2478	Larp1_S751	5.39973	2	Nonresponders	51	D	0.0857616
Mtor_S2454	Larp1_S801	5.19523	2	Nonresponders	51	P	0.0221594
Mtor_S2478	Larp1_S81	2.00208	2	Nonresponders	51	P	-0.0354564
Mtor_T2473	Larp1_T503	1.58696	2	Nonresponders	51	P	-0.118986
Mtor_S2454	Larp1_T759	4.31114	2	Nonresponders	51	P	0.0291071
Mtor_S2481	Larp1_T762	10.1408	2	Nonresponders	51	P	-0.138835
Prkcd_S671	Lmnb2_S427	10.0167	2	Nonresponders	51	P	3.20343e-16
Akt1_S129	Luc7l2_S283	5.16985	2	Nonresponders	51	P	0.000171192
Akt1_S124	Luc7l2_S285	3.08882	2	Nonresponders	51	P	0.00245716
Akt1_S124	Luc7l2_S383	2.48771	2	Nonresponders	51	P	2.2424e-15
PKB473	Luc7l2_S384	0.884461	2	Nonresponders	51	P	0.000118686
Rps6ka4_T687	Luzp1_S703	1.96241	2	Nonresponders	51	P	-0.232292
Rps6ka3_S715	Magi1_S1341	11.614	2	Nonresponders	51	D	0.644522
Ptk2b_S375	Map3k4_S1189	9.20897	2	Nonresponders	51	P	3.98776e-07
Mapk14_S2	Map4_S517	12.9345	2	Nonresponders	51	D	-0.0931534
Mapk14_Y182	Map4_S598	1.33956	2	Nonresponders	51	P	-0.347443
Mapk14_Y182	Map4_S667	6.52042	2	Nonresponders	51	P	-0.347442
Mapk14_Y182	Map4k2_S328	4.04795	2	Nonresponders	51	P	-0.347444
Raf1_S321	Mapk8ip3_S374	11.9559	2	Nonresponders	51	P	0.076481
Prkaca_S339	Mark3_S419	2.43785	2	Nonresponders	51	P	-0.0132128
Mapk14_Y182	Mars_S827	4.25241	2	Nonresponders	51	P	-0.172276
Prkaca_T198	Matr3_S596	1.66795	2	Nonresponders	51	P	3.98781e-07
Prkaca_S339	Matr3_S598	6.24246	2	Nonresponders	51	P	1.92206e-15
Prkaca_T198	Matr3_S604	1.42094	2	Nonresponders	51	P	4.80514e-15
Prkaca_S339	Matr3_S619	4.72517	2	Nonresponders	51	P	1.92206e-15
Srpk2_T332	Mta1_S465	2.45584	2	Nonresponders	51	P	1.92206e-15
ERK	Mtmr2_S77	3.40793	2	Nonresponders	51	P	-1.68164e-10
Src_S17	Myh9_S1943	4.3871	2	Nonresponders	51	P	-0.215829
Src_S17	Myh9_T1939	2.07816	2	Nonresponders	51	P	-0.21659
ERK	Myo9b_S1204	13.2089	2	Nonresponders	51	P	-0.0508554
ERK	Myo9b_S1274	1.14608	2	Nonresponders	51	P	-0.395609
ERK	Myo9b_S1293	7.15763	2	Nonresponders	51	D	0.272233
ERK	Myo9b_S2127	12.2956	2	Nonresponders	51	PM	-0.0797853
Irs1_S324	Nck1_S85	8.77909	2	Nonresponders	51	P	-0.0101637
Ilk_S232	Nck2_S90	5.40909	2	Nonresponders	51	P	-0.00980584
Akt1_S122	Ncl_S145	9.54486	2	Nonresponders	51	P	4.80514e-15
PKB308	Ncl_S157	5.95838	2	Nonresponders	51	P	-0.0447005
PKB308	Ncl_S28	9.59849	2	Nonresponders	51	P	-1.30604e-12
PKB473	Ncl_S34	9.59849	2	Nonresponders	51	P	5.28245e-13
PKB308	Ncl_S40	9.59849	2	Nonresponders	51	P	-1.32622e-12
PKB308	Ncl_S403	13.7272	2	Nonresponders	51	P	-0.652912
Akt1_S129	Ncl_S41	9.59841	2	Nonresponders	51	P	0.00315769
Casp7_S16	Nedd4_S309	12.5687	2	Nonresponders	51	P	-0.0620968
Casp7_S16	Nedd4_T287	2.89227	2	Nonresponders	51	P	-0.00653094
Wnk1_S2099	Nedd4l_S457	9.46643	2	Nonresponders	51	D	-0.19147
Src_S17	Nmt1_S47	1.58194	2	Nonresponders	51	P	-0.115404
Src_S17	Nmt1_S69	1.24532	2	Nonresponders	51	P	-4.37268e-14
Akt1_S126	Noc2l_S673	9.25934	2	Nonresponders	51	P	-8.00761e-12
Akt1_S122	Noc2l_S674	9.2758	2	Nonresponders	51	P	3.58784e-14
Cdk9_T186	Npm1_S125	13.7655	2	Nonresponders	51	P	0.448956
PKB308	Nrip1_S519	1.27696	2	Nonresponders	51	D	0.260242
Egfr_S1166	Numbl_S263	3.20076	2	Nonresponders	51	P	-1.60005e-10
Egfr_S1166	Numbl_S411	13.8583	2	Nonresponders	51	P	-0.511226
ERK	Pak2_S141	6.69994	2	Nonresponders	51	P	-0.58755
ERK	Parva_S19	10.5408	2	Nonresponders	51	D	0.223083
Prkaca_T198	Paxbp1_S316	7.24442	2	Nonresponders	51	P	-1.76188e-15
Casp8_S213	Pcyt1a_S319	6.22347	2	Nonresponders	51	P	-0.440952
Casp8_S213	Pcyt1a_S323	3.53747	2	Nonresponders	51	P	-0.516482
ERK	Pdxdc1_S718	4.03188	2	Nonresponders	51	P	-0.399858
ERK	Pdxdc1_S721	0.709684	2	Nonresponders	51	P	-0.34951
ERK	Pdxdc1_S722	7.37783	2	Nonresponders	51	P	-0.261307
ERK	Pdxdc1_S724	2.08003	2	Nonresponders	51	P	-0.353474
ERK	Pdxdc1_S736	2.82207	2	Nonresponders	51	P	-0.00354477
ERK	Pdxdc1_S748	4.54783	2	Nonresponders	51	P	-0.79191
ERK	Pdxdc1_T720	1.72693	2	Nonresponders	51	P	-0.191586
ERK	Pinx1_S233	6.85715	2	Nonresponders	51	P	-0.0458465
Prkaca_T198	Pkd2_S810	4.44832	2	Nonresponders	51	P	3.98781e-07
Mapk14_S2	Pml_S528	8.3179	2	Nonresponders	51	PM	-0.00569208
Gsk3b_S219	Prkar2a_S97	1.0019	2	Nonresponders	51	P	-0.0993878
Srpk2_T333	Prpf40a_S879	3.64291	2	Nonresponders	51	P	-0.00196369
Srpk2_S488	Prpf40a_S881	7.94458	2	Nonresponders	51	P	-3.39128e-11
Brd4_S1154	Prpf40a_S884	6.99818	2	Nonresponders	51	P	0.449031
Mapk14_S2	Psmd1_S364	1.98799	2	Nonresponders	51	P	0.0139747
Src_S17	Ptpn21_S799	2.1673	2	Nonresponders	51	P	-4.8052e-10
Casp8_S188	Ralbp1_T60	0.75227	2	Nonresponders	51	P	3.9878e-07
Akt1_S129	Ralgapa2_S362	7.45379	2	Nonresponders	51	P	4.16445e-15
PKB308	Ralgapa2_S373	0.794044	2	Nonresponders	51	P	-0.0904316
Akt1_S129	Ralgapa2_S375	6.63711	2	Nonresponders	51	P	0.00316419
Akt1_S126	Ralgapa2_S376	2.74646	2	Nonresponders	51	P	-0.0598647
Akt1_S122	Ralgapa2_S379	2.55338	2	Nonresponders	51	P	0.00322997
PKB308	Ralgapa2_S765	15.0496	2	Nonresponders	51	PM	-0.0486955
PKB308	Ralgapa2_S816	4.92042	2	Nonresponders	51	P	-0.477921
PKB308	Ralgapa2_S857	7.65212	2	Nonresponders	51	D	0.749889
PKB473	Ralgapa2_S858	4.92293	2	Nonresponders	51	P	0.000539543
Src_S17	Rbm10_S723	10.0062	2	Nonresponders	51	P	1.60171e-15
Src_S17	Rbm10_S736	13.4424	2	Nonresponders	51	P	-4.17681e-10
Src_S17	Rbm10_S738	13.4424	2	Nonresponders	51	P	1.60171e-15
Src_S17	Rbm10_S89	2.02665	2	Nonresponders	51	P	-1.60171e-15
Brd4_S1154	Rfc1_T109	1.33174	2	Nonresponders	51	P	0.449035
Egfr_S1166	Rin2_S366	2.17738	2	Nonresponders	51	P	-0.439252
Egfr_S1166	Rin2_S494	7.59229	2	Nonresponders	51	P	-0.511289
Egfr_S1166	Rin2_S79	12.1427	2	Nonresponders	51	P	-0.280287
Mtor_S2481	Rprd1b_S134	6.19683	2	Nonresponders	51	P	-0.117724
Eif4b_S422	Rps6kb1_S447	14.9423	2	Nonresponders	51	P	-0.473749
Ulk1_S549	Sec16a_S2315	10.6957	2	Nonresponders	51	P	-0.0577997
Src_S17	Sf3b2_S292	2.13942	2	Nonresponders	51	P	-0.11206
Src_S17	Sf3b2_S414	6.1033	2	Nonresponders	51	P	1.92206e-15
Src_S17	Sf3b2_S418	2.58527	2	Nonresponders	51	P	-0.17078
Src_S17	Sf3b2_S419	2.58532	2	Nonresponders	51	P	-0.170741
Src_S17	Sf3b2_S844	14.8113	2	Nonresponders	51	D	0.189743
Src_S17	Sf3b2_T763	4.20019	2	Nonresponders	51	P	-2.71502e-11
Src_S17	Sh3bp1_S456	4.10845	2	Nonresponders	51	P	-0.216593
Akt1_S124	Sh3bp4_S278	1.12379	2	Nonresponders	51	P	0.00124724
PKB473	Slc9a3r1_S263	7.00946	2	Nonresponders	51	P	0.0115505
PKB308	Slc9a3r1_S264	6.37269	2	Nonresponders	51	P	-0.0125674
Akt1_S129	Slc9a3r1_S275	7.62691	2	Nonresponders	51	P	0.0031634
Akt1_S124	Slc9a3r1_S285	2.32967	2	Nonresponders	51	P	-0.0365512
Akt1_S122	Slc9a3r1_S297	2.65603	2	Nonresponders	51	P	0.00202616
Prkaca_S339	Smarcc2_S283	4.93076	2	Nonresponders	51	D	-0.00217892
PKB473	Smarcc2_S810	3.94585	2	Nonresponders	51	P	5.68843e-06
Akt1_S124	Snip1_S18	5.77728	2	Nonresponders	51	P	5.38176e-13
Akt1_S124	Snip1_S33	3.79763	2	Nonresponders	51	D	-0.00736729
Akt1_S126	Snip1_S48	5.44733	2	Nonresponders	51	P	-5.80653e-12
Akt1_S126	Snip1_S50	9.30976	2	Nonresponders	51	P	-1.88454e-11
Akt1_S129	Snrnp70_S226	4.81693	2	Nonresponders	51	P	0.0031646
PKB308	Snrnp70_S408	5.50264	2	Nonresponders	51	D	0.13179
Mast2_S1368	Sntb2_S75	0.389233	2	Nonresponders	51	P	0.0756825
Mast2_S1368	Sntb2_S90	4.03907	2	Nonresponders	51	P	0.35456
Src_S17	Sorbs1_S235	3.43161	2	Nonresponders	51	P	-0.21659
Src_S17	Sorbs1_S301	5.58932	2	Nonresponders	51	P	-0.201242
Src_S17	Sorbs1_S329	5.47152	2	Nonresponders	51	P	-0.216593
Src_S17	Sorbs1_S336	1.2031	2	Nonresponders	51	P	-0.176618
Src_S17	Sorbs1_S633	0.108345	2	Nonresponders	51	P	-0.119161
Src_S17	Sorbs1_S88	1.47485	2	Nonresponders	51	P	-0.216588
Map3k3_S340	Spag9_S691	11.5527	2	Nonresponders	51	P	-0.258525
Map3k3_S340	Spag9_S716	7.73698	2	Nonresponders	51	P	-0.454598
Akt1_S126	Srek1_S581	2.58117	2	Nonresponders	51	P	3.20343e-16
PKB308	Srek1_S602	3.93831	2	Nonresponders	51	P	-1.18014e-12
Csnk2b_S209	Srpk1_S311	4.81546	2	Nonresponders	51	P	-0.200094
Csnk2b_S209	Srpk1_S450	5.27686	2	Nonresponders	51	P	-0.200091
Csnk2b_S209	Srpk1_T448	1.65453	2	Nonresponders	51	P	-0.200051
Mtor_T2473	Srrm1_S207	10.3019	2	Nonresponders	51	P	-8.44519e-12
Mtor_S2481	Srrm1_S209	11.3745	2	Nonresponders	51	P	-9.76725e-12
Mtor_S2448	Srrm1_S211	7.53399	2	Nonresponders	51	P	-4.92376e-11
Mtor_S2454	Srrm1_S220	6.74313	2	Nonresponders	51	P	6.30434e-13
Mtor_S2454	Srrm1_S387	6.77475	2	Nonresponders	51	P	5.97823e-12
Mtor_S2448	Srrm1_S389	10.4081	2	Nonresponders	51	P	-7.51364e-12
Mtor_S2448	Srrm1_S391	12.4373	2	Nonresponders	51	P	-7.10241e-11
Mtor_S2448	Srrm1_S400	1.27043	2	Nonresponders	51	D	0.0218472
Mtor_S1261	Srrm1_S401	8.54155	2	Nonresponders	51	P	1.69782e-14
Mtor_S2454	Srrm1_S412	3.1649	2	Nonresponders	51	P	0.000430737
Mtor_S2478	Srrm1_S427	5.22008	2	Nonresponders	51	P	-2.67617e-11
Mtor_T2474	Srrm1_S429	4.58824	2	Nonresponders	51	P	4.87562e-12
Mtor_S2481	Srrm1_S448	5.94792	2	Nonresponders	51	P	-2.75389e-11
Mtor_S2481	Srrm1_S450	7.92155	2	Nonresponders	51	P	-0.0100069
Mtor_S2478	Srrm1_S461	3.92572	2	Nonresponders	51	P	-0.00195273
Mtor_S1261	Srrm1_S463	11.1488	2	Nonresponders	51	P	0.0681239
Mtor_S2481	Srrm1_S528	9.03605	2	Nonresponders	51	P	-1.21382e-10
Mtor_S2478	Srrm1_S550	13.498	2	Nonresponders	51	P	-3.83576e-10
Mtor_S1261	Srrm1_S561	0.995	2	Nonresponders	51	P	0.060911
Mtor_S2481	Srrm1_S563	2.13351	2	Nonresponders	51	P	-2.75373e-11
Mtor_S2481	Srrm1_S572	3.37271	2	Nonresponders	51	P	-1.75218e-11
Mtor_T2474	Srrm1_S574	1.63273	2	Nonresponders	51	P	-0.140304
Mtor_T2474	Srrm1_S591	1.7657	2	Nonresponders	51	D	0.150011
Mtor_S2448	Srrm1_S602	0.749067	2	Nonresponders	51	P	-3.54139e-12
Mtor_S2448	Srrm1_S616	5.24875	2	Nonresponders	51	D	0.0565413
Mtor_T2474	Srrm1_S624	9.46824	2	Nonresponders	51	P	6.78024e-11
Mtor_S2454	Srrm1_S626	8.35092	2	Nonresponders	51	D	-0.00404329
Mtor_T2473	Srrm1_S635	3.67069	2	Nonresponders	51	P	-6.21785e-12
Mtor_S2481	Srrm1_S655	3.9894	2	Nonresponders	51	P	-0.114608
Mtor_S2478	Srrm1_S657	11.1041	2	Nonresponders	51	P	-2.67621e-11
Mtor_S1261	Srrm1_S664	11.2382	2	Nonresponders	51	D	-0.035641
Mtor_S1261	Srrm1_S672	7.77731	2	Nonresponders	51	P	0.021162
Mtor_T2473	Srrm1_S674	11.3809	2	Nonresponders	51	P	-6.22105e-12
Mtor_S2448	Srrm1_S702	1.87705	2	Nonresponders	51	P	-7.10238e-11
Mtor_S2481	Srrm1_S704	1.87705	2	Nonresponders	51	P	-2.75389e-11
Mtor_T2474	Srrm1_S714	7.26121	2	Nonresponders	51	P	4.56488e-13
Mtor_T2473	Srrm1_S723	2.94732	2	Nonresponders	51	P	-0.0133803
Mtor_S2478	Srrm1_S725	2.2772	2	Nonresponders	51	P	-0.00757671
Mtor_S2478	Srrm1_S731	8.75033	2	Nonresponders	51	P	-3.09983e-11
Mtor_T2473	Srrm1_S733	0.871332	2	Nonresponders	51	P	-0.00526812
Mtor_S2454	Srrm1_S743	11.0816	2	Nonresponders	51	P	1.92206e-14
Mtor_S1261	Srrm1_S784	10.4387	2	Nonresponders	51	P	1.69782e-14
Mtor_T2473	Srrm1_S789	1.31829	2	Nonresponders	51	P	-0.0277466
Mtor_T2473	Srrm1_S793	8.80817	2	Nonresponders	51	P	-0.00578136
Mtor_T2473	Srrm1_S795	1.51513	2	Nonresponders	51	D	0.281679
Mtor_S2448	Srrm1_S797	12.3309	2	Nonresponders	51	P	-3.37897e-12
Mtor_T2474	Srrm1_S810	4.90374	2	Nonresponders	51	P	-0.138453
Mtor_S2454	Srrm1_S814	7.39776	2	Nonresponders	51	P	1.55911e-12
Mtor_S2481	Srrm1_S816	5.36303	2	Nonresponders	51	D	0.0282953
Mtor_S2481	Srrm1_S822	11.9645	2	Nonresponders	51	P	-8.84754e-12
Mtor_S2481	Srrm1_S832	3.95994	2	Nonresponders	51	P	-0.118391
Mtor_S2448	Srrm1_S838	8.72124	2	Nonresponders	51	P	-3.7195e-12
Mtor_S2478	Srrm1_S843	4.36234	2	Nonresponders	51	P	-7.18016e-12
Mtor_S2481	Srrm1_S915	5.23668	2	Nonresponders	51	D	0.0538773
Mtor_S2448	Srrm1_T404	3.02931	2	Nonresponders	51	D	0.0399276
Mtor_S2454	Srrm1_T593	1.75705	2	Nonresponders	51	D	0.158748
Mtor_S2478	Srrm1_T600	0.934761	2	Nonresponders	51	P	-0.00134767
Mtor_S2481	Srrm1_T633	10.6199	2	Nonresponders	51	P	-0.0211205
Mtor_S1261	Srrm1_T745	5.16933	2	Nonresponders	51	P	0.0909534
Mtor_T2473	Srrm1_T834	4.61382	2	Nonresponders	51	P	-6.21945e-12
Mtor_S2481	Srrm1_T913	2.70352	2	Nonresponders	51	D	0.0721308
Src_S17	Srrt_S67	9.28956	2	Nonresponders	51	P	2.2424e-15
Src_S17	Srrt_S74	3.02956	2	Nonresponders	51	P	-5.59789e-11
Prkaca_S339	Srsf2_S187	3.65033	2	Nonresponders	51	P	-0.00814002
Srpk2_S488	Srsf2_S189	3.73102	2	Nonresponders	51	P	-0.325506
Srpk2_T333	Srsf2_S191	2.68521	2	Nonresponders	51	P	-0.00196373
Srpk2_S10	Srsf2_S206	3.36738	2	Nonresponders	51	P	0.00177691
Srpk2_S491	Srsf2_S208	2.0021	2	Nonresponders	51	P	0.000801808
Srpk2_S10	Srsf2_S212	3.31973	2	Nonresponders	51	D	-0.00174336
Prkaca_S339	Srsf2_S220	15.1413	2	Nonresponders	51	P	-1.60171e-16
Srpk2_S10	Srsf2_S26	6.29374	2	Nonresponders	51	P	-2.72291e-15
PKB473	Srsf5_S227	4.23915	2	Nonresponders	51	P	0.00213194
PKB308	Srsf5_S229	14.309	2	Nonresponders	51	P	-0.00437883
PKB308	Srsf5_S231	14.7116	2	Nonresponders	51	P	-0.000925358
PKB473	Srsf5_S248	2.5499	2	Nonresponders	51	P	5.34332e-13
Akt2_S126	Srsf5_S251	5.03495	2	Nonresponders	51	P	-0.0111513
PKB308	Ssb_S92	4.9876	2	Nonresponders	51	P	-0.0303064
ERK	Ssbp3_S347	3.99639	2	Nonresponders	51	D	0.974129
ERK	Ssbp3_T360	2.02528	2	Nonresponders	51	P	-0.903738
Nr3c1_T159	Stat5a_S779	4.78227	2	Nonresponders	51	P	-0.332775
Ptk2b_S375	Stub1_S20	1.5947	2	Nonresponders	51	P	3.98776e-07
Prkaca_T198	Stub1_S24	1.85428	2	Nonresponders	51	P	3.98781e-07
ERK	Sympk_S1260	4.39277	2	Nonresponders	51	P	-0.0526422
Fgfr1_Y663	Tenc1_S102	9.79427	2	Nonresponders	51	P	0.00315399
Fgfr1_Y663	Tenc1_S1087	12.2578	2	Nonresponders	51	P	0.0409053
Fgfr1_Y663	Tenc1_S466	9.08284	2	Nonresponders	51	P	0.0409145
Fgfr1_Y663	Tenc1_S830	3.29843	2	Nonresponders	51	P	0.0409104
Fgfr1_Y663	Tenc1_S832	5.55777	2	Nonresponders	51	P	0.00315399
Fgfr1_Y663	Tenc1_S835	14.5754	2	Nonresponders	51	P	0.00315407
Fgfr1_Y663	Tenc1_S931	1.96372	2	Nonresponders	51	P	0.00315399
Fgfr1_Y663	Tenc1_S941	2.1088	2	Nonresponders	51	P	0.00315399
Fgfr1_Y663	Tenc1_S991	8.6512	2	Nonresponders	51	P	0.00315399
Src_S17	Thrap3_S243	6.26151	2	Nonresponders	51	P	1.92206e-15
Src_S17	Thrap3_S248	11.0875	2	Nonresponders	51	P	1.28137e-15
Src_S17	Thrap3_S315	2.66132	2	Nonresponders	51	P	-0.199441
Src_S17	Thrap3_S379	7.43049	2	Nonresponders	51	P	-2.88308e-15
Src_S17	Thrap3_S403	6.93304	2	Nonresponders	51	P	-3.32969e-10
Src_S17	Thrap3_S405	7.6566	2	Nonresponders	51	P	-1.95409e-14
Src_S17	Thrap3_S53	4.28228	2	Nonresponders	51	P	-4.73624e-10
Src_S17	Thrap3_S55	4.72942	2	Nonresponders	51	P	-3.34561e-10
Src_S17	Thrap3_S669	2.63718	2	Nonresponders	51	P	1.60171e-15
Src_S17	Thrap3_S679	12.2745	2	Nonresponders	51	D	0.216594
Src_S17	Thrap3_S924	13.1911	2	Nonresponders	51	P	-5.48568e-11
Src_S17	Thrap3_S935	10.3942	2	Nonresponders	51	D	0.216596
Egfr_S1166	Tjp1_S131	3.03288	2	Nonresponders	51	P	-4.21433e-10
Egfr_S1166	Tjp1_S175	4.01791	2	Nonresponders	51	P	-0.231573
Egfr_S1166	Tjp1_S178	8.61057	2	Nonresponders	51	P	-0.472542
Egfr_S1166	Tjp1_S179	5.97593	2	Nonresponders	51	P	-0.282873
Egfr_S1166	Tjp1_S311	7.24151	2	Nonresponders	51	P	-0.441124
Egfr_S1166	Tjp1_S617	4.34975	2	Nonresponders	51	P	-0.243459
Egfr_S1166	Tjp1_S912	0.483415	2	Nonresponders	51	P	-0.278192
ERK	Top2b_S1387	9.69671	2	Nonresponders	51	P	-0.0385802
ERK	Top2b_S1400	4.27565	2	Nonresponders	51	P	-0.0456865
ERK	Top2b_S1453	4.12283	2	Nonresponders	51	P	-1.68188e-10
ERK	Top2b_S1509	2.06587	2	Nonresponders	51	P	-0.00354477
ERK	Top2b_S1511	2.42315	2	Nonresponders	51	P	-0.00354478
ERK	Top2b_S1513	1.67327	2	Nonresponders	51	P	-0.0458465
ERK	Top2b_S1539	1.1838	2	Nonresponders	51	P	-0.124005
Mdm2_S163	Tp53bp1_S376	3.92784	2	Nonresponders	51	P	0.00144411
Akt1_S124	Tp53bp1_S382	4.07247	2	Nonresponders	51	P	-0.00944548
Mdm2_S163	Tp53bp1_S822	14.9459	2	Nonresponders	51	P	-0.0308429
Sumo1_S2	Trim24_S745	3.43096	2	Nonresponders	51	P	0.367771
Sumo1_S2	Trim24_S812	0.849694	2	Nonresponders	51	P	0.367789
Prkaca_S339	Trim28_S51	12.0072	2	Nonresponders	51	D	-0.0021789
PKB473	Trip10_S296	13.8841	2	Nonresponders	51	P	0.00835748
Prkcd_S669	Tsc22d4_S62	14.9201	2	Nonresponders	51	P	-0.119105
ERK	Ubap2l_S492	4.14561	2	Nonresponders	51	D	0.0855838
ERK	Ubap2l_S502	0.562149	2	Nonresponders	51	D	0.130115
ERK	Ubap2l_S634	9.0432	2	Nonresponders	51	P	-0.570695
Mtor_S2481	Ubr4_S2715	0.97834	2	Nonresponders	51	P	-0.0137717
Mtor_T2473	Ubr4_S2716	1.87311	2	Nonresponders	51	P	-0.00417585
Mtor_T2474	Ubr4_S2719	7.66584	2	Nonresponders	51	PM	0.000347597
Mtor_S1261	Ubr4_S2892	1.80232	2	Nonresponders	51	D	-0.193621
Mtor_S2448	Ubr4_T2721	2.93799	2	Nonresponders	51	D	0.0796157
Bcr_S461	Unc119_S37	1.87656	2	Nonresponders	51	P	6.40685e-16
Bcr_S461	Unc119_S39	10.293	2	Nonresponders	51	P	3.98781e-07
Bcr_S461	Unc119_S41	10.6854	2	Nonresponders	51	P	3.52377e-15
Akt1_S126	Usp14_S393	6.65833	2	Nonresponders	51	P	-0.0325025
Prkaca_S339	Usp20_S132	2.96272	2	Nonresponders	51	P	1.92206e-15
Prkaca_T198	Usp20_S134	14.8736	2	Nonresponders	51	P	3.52377e-15
Prkaca_S339	Usp20_S369	4.00303	2	Nonresponders	51	P	0.00215332
Prkaca_S339	Usp20_T378	2.31122	2	Nonresponders	51	P	0.00217875
Wnk1_S2099	Wnk4_S783	4.54066	2	Nonresponders	51	D	-0.191665
Src_S17	Ythdc1_S146	9.13458	2	Nonresponders	51	P	-0.103814
Src_S17	Ythdc1_S425	0.99696	2	Nonresponders	51	P	-4.80514e-16
Src_S17	Ythdc1_T148	4.76106	2	Nonresponders	51	P	-9.47348e-10
Src_S17	Zc3h4_S917	7.18187	2	Nonresponders	51	P	-0.216588
Mtor_S2478	Znf768_S100	5.04116	2	Nonresponders	51	P	-0.0200177
Mtor_T2473	Znf768_S135	12.2991	2	Nonresponders	51	P	-0.290745
Mtor_T2473	Znf768_S142	12.3016	2	Nonresponders	51	P	-0.291622
Mtor_S2478	Znf768_S191	3.75589	2	Nonresponders	51	P	-1.60171e-16
Mtor_S1261	Znf768_S93	6.42391	2	Nonresponders	51	P	1.69782e-14
Mtor_T2474	Znrf2_S107	1.37622	2	Nonresponders	51	P	0.0165217
Mtor_S1261	Znrf2_S110	9.39766	2	Nonresponders	51	D	-0.153401
Mtor_S2448	Znrf2_S113	10.5107	2	Nonresponders	51	P	-0.0392716
Mtor_S2448	Znrf2_S141	7.84844	2	Nonresponders	51	P	-0.0894017
Mtor_S2454	Znrf2_S147	12.6478	2	Nonresponders	51	P	0.0256492
Mtor_T2474	Znrf2_S75	3.25247	2	Nonresponders	51	P	0.0330368
PKB308	Zranb2_S315	5.58467	2	Nonresponders	51	P	-0.00929539
PKB308	Zranb2_S317	5.58468	2	Nonresponders	51	P	-0.00929796
Clk3_S175	Anks1a_S644	12.0363	2	Nonresponders	52	P	-0.152948
Pak2_S141	Arhgef7_S497	2.97715	6	Nonresponders	52	P	-0.101459
Ccny_S326	Cdk14_S120	7.64343	3	Nonresponders	52	P	0.0188
Csnk1d_S328	Csnk1e_S363	2.28803	4	Nonresponders	52	P	8.96959e-15
Akap8l_S284	Dhx9_S137	0.503953	4	Nonresponders	52	P	-0.0021808
Eef1d_T147	Eef1g_T46	3.76541	4	Nonresponders	52	P	-0.117406
Nr3c1_T159	Hdac1_S393	14.066	3	Nonresponders	52	D	0.387267
Trim28_S51	Hdac1_S393	14.066	2	Nonresponders	52	P	0.387267
Srpk1_S450	Lbr_S101	1.00223	2	Nonresponders	52	P	-0.200049
Srpk1_S450	Lbr_S71	12.5294	2	Nonresponders	52	P	-0.200063
Map3k7_S439	Map4k4_S752	7.73849	3	Nonresponders	52	D	-0.27519
Nck1_S85	Map4k4_S752	7.73849	2	Nonresponders	52	PM	-0.27519
Mark3_S419	Pnpla2_S350	0.756232	2	Nonresponders	52	P	-0.00720564
Mark3_S419	Pnpla2_S374	10.8692	2	Nonresponders	52	P	-0.00717968
Srpk1_S450	Rbm8a_S55	14.347	6	Nonresponders	52	D	0.200056
Mark3_S419	Saal1_S14	4.42248	2	Nonresponders	52	P	-0.00709635
Mark3_S419	Saal1_S6	4.27939	2	Nonresponders	52	P	-0.00709868
Srpk1_T448	Safb_S626	2.4462	3	Nonresponders	52	P	-0.0327432
Srpk1_S450	Scaf11_S525	4.80407	2	Nonresponders	52	P	-0.027593
Srpk1_T448	Scaf11_S848	3.23783	2	Nonresponders	52	P	-0.0333208
Srpk1_T448	Scaf11_S884	2.2589	2	Nonresponders	52	P	-0.0326697
Srpk1_S450	Scaf11_S898	6.16828	2	Nonresponders	52	P	-0.0252811
Srpk1_T448	Scaf11_S900	2.26752	2	Nonresponders	52	P	-0.029999
Srpk1_S450	Scaf11_S902	4.30758	2	Nonresponders	52	P	-0.0277073
Pak2_S141	Sh3kbp1_S175	14.8758	3	Nonresponders	52	PM	-0.00850999
Clk3_S175	Srsf1_S231	5.92541	2	Nonresponders	52	D	0.307618
Srpk1_S311	Srsf3_S138	2.52747	3	Nonresponders	52	P	-0.0274153
Srpk1_S450	Srsf3_S140	6.45134	3	Nonresponders	52	P	-0.027646
Srpk1_T448	Srsf6_S299	3.71595	3	Nonresponders	52	P	-0.032947
Srpk1_S311	Srsf6_S303	0.813574	3	Nonresponders	52	P	-0.0275028
Srpk1_T448	Srsf6_S314	3.6348	3	Nonresponders	52	P	-0.0324351
Srpk1_S311	Srsf6_S316	6.27572	3	Nonresponders	52	P	-0.0273475
Srpk1_S450	Srsf6_S81	2.45361	3	Nonresponders	52	P	-0.173067
Map4k2_S328	Stip1_S481	1.8067	2	Nonresponders	52	P	-0.347395
Gsk3b_S219	Aak1_S621	11.3813	1	Nonresponders	53	D	0.164565
Gsk3b_S219	Aak1_S622	4.80921	1	Nonresponders	53	P	-0.0993878
ERK	Aak1_S635	10.8703	1	Nonresponders	53	D	0.406204
ERK	Aak1_S650	13.2847	1	Nonresponders	53	P	-0.0433311
ERK	Aak1_S668	7.82896	1	Nonresponders	53	P	-0.00354477
ERK	Aak1_S674	12.5017	1	Nonresponders	53	P	-0.37332
ERK	Aak1_S676	7.27063	1	Nonresponders	53	P	-0.46843
Gsk3b_Y216	Aak1_T618	4.68568	1	Nonresponders	53	P	9.61028e-16
Gsk3b_S219	Aak1_T651	13.3792	1	Nonresponders	53	P	-0.0993878
ERK	Aak1_T672	4.67995	1	Nonresponders	53	D	0.00283428
Rps6ka3_S375	Abca1_S1296	9.025	1	Nonresponders	53	PM	-0.00356209
Csnk1e_S363	Abcf1_S138	5.04708	1	Nonresponders	53	P	5.44583e-15
Csnk1e_S363	Abcf1_S194	5.98635	1	Nonresponders	53	P	4.4848e-15
Csnk1e_S363	Abcf1_S224	1.80625	1	Nonresponders	53	P	2.56274e-15
Csnk1e_S363	Abcf1_S90	2.59698	1	Nonresponders	53	P	8.32891e-15
Rps6ka3_S715	Ablim1_S567	14.6184	1	Nonresponders	53	P	-0.0430744
ERK	Ablim1_S596	4.50731	1	Nonresponders	53	P	-0.118343
Akt1_S126	Acap2_S379	3.31964	1	Nonresponders	53	P	-1.60171e-16
Akt1_S124	Acap2_S384	8.18849	1	Nonresponders	53	P	0.00736696
Akt1_S129	Acap2_S387	6.74323	1	Nonresponders	53	P	1.99573e-13
Rxra_S22	Acsl1_S278	2.32922	1	Nonresponders	53	P	0.011748
Rxra_S22	Acsl1_S411	4.29841	1	Nonresponders	53	P	0.0317941
Rxra_S22	Acsl1_S621	0.936533	1	Nonresponders	53	P	0.013913
Rxra_S22	Acsl1_T280	4.90534	1	Nonresponders	53	P	-0.000278565
Rps6ka3_S375	Add1_S427	4.47282	1	Nonresponders	53	PM	-0.0178878
Rps6ka3_T365	Add1_S431	10.9546	1	Nonresponders	53	P	-0.964898
Rps6ka3_S375	Add3_S645	5.92327	1	Nonresponders	53	P	-0.0140609
Rps6ka3_S415	Add3_S649	6.41408	1	Nonresponders	53	P	-0.0470063
Prkaca_T198	Add3_S651	1.81478	1	Nonresponders	53	P	3.98781e-07
Hdac1_S423	Aes_S196	5.06769	1	Nonresponders	53	P	-0.187612
Gsk3b_Y216	Aff1_S390	6.75016	1	Nonresponders	53	P	3.20343e-16
Map3k3_S340	Aifm1_S267	2.46701	1	Nonresponders	53	P	-0.00110078
ERK	Akap12_S613	1.31611	1	Nonresponders	53	P	-0.620018
ERK	Akap12_S615	1.66464	1	Nonresponders	53	P	-0.561202
Gsk3b_S219	Akap1_S134	6.0646	1	Nonresponders	53	P	-0.0876098
Gsk3b_Y216	Akap1_S88	2.29002	1	Nonresponders	53	P	0.000754358
Nf2_S518	Amotl1_S731	10.6484	1	Nonresponders	53	D	-0.00166411
Nf2_S518	Amotl1_S804	12.4754	1	Nonresponders	53	P	0.00166377
Nf2_S518	Amotl1_S816	5.96565	1	Nonresponders	53	P	2.56274e-15
Nf2_S518	Amotl1_S840	15.1657	1	Nonresponders	53	D	-0.000594198
Nf2_S518	Amotl1_S918	6.35008	1	Nonresponders	53	P	1.60171e-15
Wnk1_S2099	Anks1a_S903	6.14017	1	Nonresponders	53	D	-0.376446
Mapk14_S2	Ap3d1_S632	4.02903	1	Nonresponders	53	P	0.0878259
Mapk14_Y182	Ap3d1_S636	0.573096	1	Nonresponders	53	D	0.168627
Mapk14_Y182	Ap3d1_S754	7.19387	1	Nonresponders	53	P	-0.347443
Mapk14_Y182	Ap3d1_S784	5.11444	1	Nonresponders	53	D	0.12844
Mapk14_S2	Ap3d1_T758	5.29122	1	Nonresponders	53	P	1.18078e-12
Prkcd_S688	Aqp1_S262	8.91294	1	Nonresponders	53	P	9.61028e-16
PKB473	Arfgap2_S145	14.9257	1	Nonresponders	53	P	0.0615348
Rps6ka3_S369	Arfgef2_S1518	1.96581	1	Nonresponders	53	P	0.335349
Rps6ka3_S369	Arfgef2_S1520	0.266002	1	Nonresponders	53	P	0.157747
Rps6ka3_S375	Arfgef2_S1521	11.0218	1	Nonresponders	53	PM	-0.00343408
Rps6ka3_T365	Arfgef2_S1535	1.16686	1	Nonresponders	53	P	-0.404777
Rps6ka3_S375	Arfgef2_S227	2.61706	1	Nonresponders	53	P	-0.0100098
Rps6ka3_S375	Arfgef2_S276	14.6694	1	Nonresponders	53	PM	-0.00242357
Rps6ka3_S715	Arfgef2_S356	4.80361	1	Nonresponders	53	P	-0.0382921
Rps6ka3_S375	Arfgef2_T224	2.39221	1	Nonresponders	53	P	-0.110353
Rps6ka3_S375	Arhgap12_S163	5.56386	1	Nonresponders	53	P	-0.457292
Mapk14_S2	Arhgap12_S199	10.4307	1	Nonresponders	53	P	0.0719059
Gsk3b_S219	Arhgap12_S211	4.91478	1	Nonresponders	53	P	-0.0993878
Rps6ka3_T365	Arhgap12_S213	3.15653	1	Nonresponders	53	P	-0.370053
Rps6ka3_S715	Arhgap12_S238	12.4155	1	Nonresponders	53	P	-0.151113
Gsk3b_S219	Arhgap12_T229	5.62161	1	Nonresponders	53	P	-0.0993878
Mdm2_S163	Arhgap24_S390	9.89183	1	Nonresponders	53	P	0.00368583
Mdm2_S183	Arhgap24_S397	15.2854	1	Nonresponders	53	P	5.60279e-12
ERK	Arhgef17_T695	4.55283	1	Nonresponders	53	P	-0.760504
Rps6ka3_S375	Arhgef2_S947	8.27026	1	Nonresponders	53	P	-0.292492
Arhgef12_S638	Arhgef7_S228	0.465575	1	Nonresponders	53	P	-0.435242
Gsk3b_Y216	Arid1a_S697	6.05851	1	Nonresponders	53	P	-1.60171e-16
Gsk3b_Y216	Arid4b_S295	3.45201	1	Nonresponders	53	P	3.20343e-16
Gsk3b_S219	Arid4b_S296	3.86589	1	Nonresponders	53	P	-0.0993878
Gsk3b_Y216	Arid4b_S839	6.23947	1	Nonresponders	53	P	6.40685e-16
Abi2_S177	Arpc1b_S314	8.43882	1	Nonresponders	53	P	-0.0284859
Cttn_S407	Arpc1b_S315	6.88581	1	Nonresponders	53	P	0.306648
Prkaca_S339	Arpp19_S95	0.717088	1	Nonresponders	53	P	0.00167621
Tjp2_S147	Arvcf_T637	3.19404	1	Nonresponders	53	PM	-0.011454
Srpk2_T332	Asap3_S286	14.7855	1	Nonresponders	53	P	-0.0021229
ERK	Atg2b_S496	13.5312	1	Nonresponders	53	P	-0.936712
Mapk14_S2	Atn1_S101	3.41258	1	Nonresponders	53	P	0.0899115
Rps6ka3_S369	Atn1_S107	1.86268	1	Nonresponders	53	P	0.439019
Rps6ka3_S375	Atn1_S34	1.06745	1	Nonresponders	53	P	-0.0105533
Rps6ka3_T365	Atn1_S724	8.99247	1	Nonresponders	53	P	-0.0310363
Mapk14_Y182	Atn1_S731	9.20466	1	Nonresponders	53	P	-2.38821e-09
Rps6ka3_S415	Atn1_S733	9.20466	1	Nonresponders	53	P	-1.37752e-10
Rps6ka3_S375	Atn1_S77	5.25236	1	Nonresponders	53	P	-0.0139127
Rps6ka3_T365	Atn1_S79	4.22923	1	Nonresponders	53	P	-0.0602298
Rps6ka3_T365	Atn1_S881	12.2698	1	Nonresponders	53	P	-0.202869
Mapk14_Y182	Atrx_S1041	3.6551	1	Nonresponders	53	P	-2.39157e-09
Mapk14_S2	Atrx_S1056	11.4934	1	Nonresponders	53	P	0.000421005
Mapk14_S2	Atrx_S1223	14.7033	1	Nonresponders	53	P	0.0991323
Mapk14_Y182	Atrx_S1335	13.0756	1	Nonresponders	53	P	-0.347441
Mapk14_Y182	Atrx_S1339	13.0791	1	Nonresponders	53	D	0.257923
Mapk14_Y182	Atrx_S1973	6.25715	1	Nonresponders	53	P	-8.12678e-10
Mapk14_Y182	Atrx_S1979	4.73548	1	Nonresponders	53	D	0.347441
Mapk14_Y182	Atrx_S315	8.94915	1	Nonresponders	53	P	-1.61426e-09
Mapk14_Y182	Atrx_S626	4.38998	1	Nonresponders	53	P	-0.0936565
Mapk14_Y182	Atrx_S717	1.97758	1	Nonresponders	53	P	-4.80514e-16
Mapk14_Y182	Atrx_S719	4.78936	1	Nonresponders	53	P	-1.7768e-09
Mapk14_Y182	Atrx_S801	13.9088	1	Nonresponders	53	P	-2.39157e-09
Mapk14_Y182	Atrx_S854	0.682413	1	Nonresponders	53	D	0.342593
Mapk14_Y182	Atrx_S855	0.686483	1	Nonresponders	53	D	0.336321
Mapk14_S2	Atrx_S897	1.99008	1	Nonresponders	53	P	0.000421005
Mapk14_Y182	Atrx_S912	3.77474	1	Nonresponders	53	P	-1.78845e-10
Mapk14_Y182	Atrx_S92	6.29192	1	Nonresponders	53	P	-1.11048e-09
Mapk14_Y182	Bag6_S995	13.5923	1	Nonresponders	53	D	0.208176
Src_S17	Bckdk_S33	2.96788	1	Nonresponders	53	P	-0.00773515
Src_S17	Bckdk_T32	4.15062	1	Nonresponders	53	P	-0.153723
Mapk14_S2	Bcl9_T155	10.4164	1	Nonresponders	53	P	0.0840379
Rps6ka3_S715	Bclaf1_S383	6.6174	1	Nonresponders	53	D	0.785846
Rps6ka3_S369	Bclaf1_S646	1.12938	1	Nonresponders	53	P	0.388059
Mapk14_S2	Bin1_S296	10.3108	1	Nonresponders	53	D	-0.0991271
Gsk3b_Y216	Bin1_S298	15.045	1	Nonresponders	53	P	0.000694944
Gsk3b_S219	Bin1_S304	1.60415	1	Nonresponders	53	P	-0.0993878
Mapk14_Y182	Bin1_S324	5.55937	1	Nonresponders	53	P	-0.347438
Prkaca_T198	Bnip3_S48	13.4695	1	Nonresponders	53	P	3.84411e-15
Prkaca_S339	Bnip3_S55	1.72266	1	Nonresponders	53	P	0.000550814
Prkaca_S339	Bnip3_S56	2.76136	1	Nonresponders	53	P	0.00218139
Prkaca_S339	Bnip3_S60	10.1611	1	Nonresponders	53	PM	0.00927411
Prkaca_T198	Bnip3_S64	9.76067	1	Nonresponders	53	P	4.16445e-15
Prkaca_S339	Bnip3_S77	6.16794	1	Nonresponders	53	P	0.000756023
Prkaca_S339	Bnip3_S79	10.6688	1	Nonresponders	53	D	-0.00217885
Prkaca_S339	Bnip3_S88	14.1553	1	Nonresponders	53	P	1.28137e-15
Prkaca_T198	Bnip3_T66	4.04422	1	Nonresponders	53	P	3.98781e-07
Prkaca_T198	Bnip3_T86	7.64506	1	Nonresponders	53	P	3.98781e-07
Ep300_S1037	Bnip3l_S117	1.80763	1	Nonresponders	53	P	-0.00867044
Ep300_S1037	Bnip3l_S118	4.12569	1	Nonresponders	53	P	4.80514e-15
Ep300_S1037	Bnip3l_S120	5.12598	1	Nonresponders	53	P	-9.24189e-13
Ep300_S1037	Bnip3l_S62	11.1869	1	Nonresponders	53	P	-0.0412234
Ep300_S1037	Bnip3l_S63	4.99212	1	Nonresponders	53	P	-0.0259869
Ep300_S1037	Bnip3l_S65	4.46583	1	Nonresponders	53	P	0.000223961
PKB308	Brd2_S497	1.83191	1	Nonresponders	53	P	-0.0170764
Gsk3b_Y216	Brd2_S500	4.61413	1	Nonresponders	53	P	0.000694654
Gsk3b_S219	Brd3_S262	2.08607	1	Nonresponders	53	P	-0.164569
ERK	Brd4_S603	0.236979	1	Nonresponders	53	P	-0.132968
Prkcd_S688	Cabin1_S1702	1.34813	1	Nonresponders	53	P	-0.0147564
S6K	Camk2d_S330	11.254	1	Nonresponders	53	P	-0.0675889
Gsk3b_Y216	Camk2d_S333	3.56965	1	Nonresponders	53	P	3.20343e-15
Gsk3b_Y216	Camk2d_S472	7.08172	1	Nonresponders	53	P	0.00069469
Gsk3b_S219	Camk2d_T331	10.3629	1	Nonresponders	53	P	-0.165179
Rps6kb1_S447	Camk2d_T336	8.31074	1	Nonresponders	53	D	0.16553
S6K	Camk2d_T337	7.56295	1	Nonresponders	53	P	-0.0776818
Rps6ka3_S375	Camk2g_S319	2.90581	1	Nonresponders	53	P	-0.0125938
Rps6ka3_S375	Camk2g_S347	3.64793	1	Nonresponders	53	D	0.328127
Gsk3b_S219	Camk2g_S350	4.15661	1	Nonresponders	53	P	-0.167324
Rps6ka3_S415	Camk2g_S373	4.21989	1	Nonresponders	53	P	-0.123157
Rps6ka3_S375	Camkk2_S137	15.4306	1	Nonresponders	53	D	-0.00115854
Rps6ka3_S415	Camkk2_S495	4.57611	1	Nonresponders	53	P	-0.578499
Rps6ka3_S369	Camkk2_S99	8.33222	1	Nonresponders	53	P	1.02412
Gsk3b_S219	Cbfa2t2_S400	7.32698	1	Nonresponders	53	P	-0.164568
Atf2_T53	Cbfb_S173	5.35106	1	Nonresponders	53	P	-0.432231
Map3k3_S340	Ccar2_S222	1.57293	1	Nonresponders	53	P	-0.00104463
Map3k3_S340	Ccar2_S625	9.57207	1	Nonresponders	53	P	-0.577409
Map3k3_S340	Ccar2_S674	7.44279	1	Nonresponders	53	P	-0.290547
Akt1_S122	Ccm2_S393	4.18742	1	Nonresponders	53	P	2.96958e-12
Akt1_S122	Ccm2_T408	14.4899	1	Nonresponders	53	P	0.00538584
Map3k3_S340	Cct5_S485	6.8806	1	Nonresponders	53	P	-0.045299
Map3k3_S340	Cct8_S537	1.60763	1	Nonresponders	53	P	-0.0115824
Rps6ka3_S715	Cdc23_S588	4.45013	1	Nonresponders	53	P	-0.452237
Rps6ka3_S375	Cdc23_T596	1.41175	1	Nonresponders	53	P	-0.656926
Psmd1_S364	Cdc26_S42	3.55005	1	Nonresponders	53	P	0.0139715
Ripk1_S313	Cdc42bpa_S1721	7.23276	1	Nonresponders	53	P	-0.229141
Ripk1_S313	Cdc42bpa_S1724	2.25392	1	Nonresponders	53	P	-0.197086
Gsk3b_Y216	Cdk11b_S234	5.89385	1	Nonresponders	53	P	1.28137e-15
Gsk3b_Y216	Cdk11b_S47	3.13504	1	Nonresponders	53	P	0.000699956
Gsk3b_Y216	Cdk11b_S578	1.90712	1	Nonresponders	53	P	6.40685e-16
Gsk3b_S219	Cdk11b_S65	3.18626	1	Nonresponders	53	P	-0.164569
Gsk3b_S219	Cdk11b_S741	8.55075	1	Nonresponders	53	P	-0.118108
Akt1_S126	Cdk13_S316	4.36688	1	Nonresponders	53	P	-0.0522899
Akt1_S122	Cdk13_S318	5.42673	1	Nonresponders	53	P	3.26365e-12
Rps6ka3_S369	Cdk13_S326	8.30301	1	Nonresponders	53	P	0.533482
Gsk3b_S219	Cdk13_S359	3.7734	1	Nonresponders	53	P	-0.0993878
PKB308	Cdk13_S361	1.80486	1	Nonresponders	53	P	-1.3086e-12
PKB308	Cdk13_S368	11.8161	1	Nonresponders	53	D	0.0906795
Rps6ka3_S375	Cdk13_S370	1.17768	1	Nonresponders	53	P	-0.338248
Rps6ka3_T365	Cdk13_S384	1.33829	1	Nonresponders	53	D	0.551706
PKB308	Cdk13_S396	1.39114	1	Nonresponders	53	D	0.121615
Rps6ka3_S375	Cdk13_S398	9.91271	1	Nonresponders	53	D	0.730742
PKB473	Cdk13_S401	11.8372	1	Nonresponders	53	D	-0.0496158
Gsk3b_Y216	Cdk13_S438	7.40415	1	Nonresponders	53	P	4.80514e-15
Rps6ka3_T365	Cdk13_S440	3.29097	1	Nonresponders	53	P	-0.0321026
Rps6ka3_S715	Cdk13_S526	14.8896	1	Nonresponders	53	D	0.743396
PKB308	Cdk13_T1225	5.13421	1	Nonresponders	53	D	0.219949
Rps6ka3_S415	Cdk13_T871	4.2314	1	Nonresponders	53	D	0.553135
ERK	Cep170_S1048	6.29075	1	Nonresponders	53	P	-0.00354477
ERK	Cep170_S1102	13.0592	1	Nonresponders	53	P	-0.0471556
ERK	Cep170_S358	2.24144	1	Nonresponders	53	D	0.676208
ERK	Cep170_S378	10.31	1	Nonresponders	53	P	-0.0508554
ERK	Cep170_S829	13.6551	1	Nonresponders	53	P	-0.0458465
ERK	Cep170b_S1341	6.79454	1	Nonresponders	53	P	-0.72232
ERK	Cep170b_S360	10.477	1	Nonresponders	53	PM	-0.196845
ERK	Chd4_S1531	3.83415	1	Nonresponders	53	D	0.826033
Gsk3b_S219	Chd4_S1535	2.19447	1	Nonresponders	53	P	-0.164563
ERK	Chd4_S1570	2.69949	1	Nonresponders	53	P	-0.816749
Mapk14_S2	Chd4_S428	2.42344	1	Nonresponders	53	P	0.0935066
Rps6ka3_S415	Clasrp_S285	12.059	1	Nonresponders	53	P	-1.37702e-10
Rps6ka3_S715	Clasrp_S450	7.49041	1	Nonresponders	53	P	-0.416229
Gsk3b_Y216	Clasrp_S636	6.13743	1	Nonresponders	53	P	-3.04326e-15
Akt1_S129	Clasrp_S639	5.36444	1	Nonresponders	53	P	0.00316423
Rps6ka3_S415	Clasrp_S643	4.30885	1	Nonresponders	53	P	-2.6782e-09
Gsk3b_S219	Clmn_S925	0.826547	1	Nonresponders	53	P	-0.173738
Git2_S393	Copa_S173	14.8915	1	Nonresponders	53	P	0.00204518
Git2_S393	Copa_S402	13.2876	1	Nonresponders	53	P	0.00204135
Nup153_S335	Cpsf2_S419	6.12156	1	Nonresponders	53	P	-0.0457095
Tpr_S2141	Cpsf2_S420	6.25832	1	Nonresponders	53	P	-3.08661e-09
Nup153_S218	Cpsf2_S423	6.13115	1	Nonresponders	53	P	-0.0321596
ERK	Crtc3_S162	13.0789	1	Nonresponders	53	PM	-0.134705
ERK	Crtc3_S329	11.7145	1	Nonresponders	53	P	-0.349673
ERK	Crtc3_S62	0.644354	1	Nonresponders	53	P	-0.439003
Mapk14_S2	Csnk1e_S408	5.05042	1	Nonresponders	53	D	-0.361474
Mapk14_Y182	Csnk1e_S408	5.05042	1	Nonresponders	53	P	-0.361474
Gsk3b_S219	Ctnna2_S651	12.0858	1	Nonresponders	53	P	-0.164545
Gsk3b_S219	Ctnna2_T653	7.19871	1	Nonresponders	53	P	-0.164569
Gsk3b_S219	Ctnna2_T657	11.7682	1	Nonresponders	53	D	0.164543
ERK	Ctnnd1_S230	1.9315	1	Nonresponders	53	D	0.550931
ERK	Ctnnd1_S268	14.9527	1	Nonresponders	53	D	0.226841
Mtor_T2474	Ctnnd1_S349	5.17871	1	Nonresponders	53	P	0.00901326
Mtor_S2481	Ctnnd1_S893	11.1515	1	Nonresponders	53	P	-0.0572123
ERK	Ctnnd1_T863	1.80678	1	Nonresponders	53	D	0.64929
Gsk3b_Y216	Ctr9_S1037	7.27171	1	Nonresponders	53	P	2.21997e-13
Rps6ka3_T365	Ctr9_S1039	1.69992	1	Nonresponders	53	P	-0.0324026
Rps6ka3_T365	Ctr9_S1041	2.00283	1	Nonresponders	53	P	-0.386317
Rps6ka3_S375	Ctr9_S941	7.90484	1	Nonresponders	53	P	-0.0104312
Rps6ka3_S369	Ctr9_S943	1.32457	1	Nonresponders	53	P	0.193214
Rps6ka3_S415	Ctr9_S970	5.61594	1	Nonresponders	53	P	-6.23976e-11
Gsk3b_Y216	Ctr9_T925	7.73582	1	Nonresponders	53	P	1.92206e-15
Map3k7_S439	Dars_S249	6.51108	1	Nonresponders	53	P	0.0280916
Map3k3_S340	Dbn1_S142	2.52104	1	Nonresponders	53	P	-0.181406
Rps6ka3_S369	Dclk1_S307	3.9916	1	Nonresponders	53	D	-0.78119
Rps6ka3_T365	Dclk1_S32	5.42393	1	Nonresponders	53	P	-1.02858
Rps6ka3_S715	Dclk1_S337	6.80269	1	Nonresponders	53	P	-0.785888
Rps6ka3_S375	Dclk1_S352	1.3599	1	Nonresponders	53	P	-0.192059
Rps6ka3_S715	Dclk1_S355	7.61621	1	Nonresponders	53	P	-0.785872
Rps6ka3_T365	Dclk1_S36	12.2071	1	Nonresponders	53	P	-1.02862
Ep300_S1037	Dcp1a_S162	3.39283	1	Nonresponders	53	P	-0.000229493
Ep300_S1037	Dcp1a_S335	8.31705	1	Nonresponders	53	D	0.0412186
Ep300_S1037	Dcp1a_S372	7.95976	1	Nonresponders	53	P	-0.0130774
Ep300_S1037	Dcp1a_S545	4.71504	1	Nonresponders	53	P	-0.0266404
Ep300_S1037	Dcp1a_S82	7.88872	1	Nonresponders	53	P	2.56274e-15
Csnk1e_S363	Ddx21_S118	5.53591	1	Nonresponders	53	P	1.18527e-14
Csnk1e_S363	Ddx21_S155	3.96416	1	Nonresponders	53	P	1.40951e-14
Csnk1e_S363	Ddx21_S192	3.17464	1	Nonresponders	53	P	3.98781e-07
Csnk1e_S363	Ddx21_S243	1.58487	1	Nonresponders	53	P	5.12548e-15
Csnk1e_S363	Ddx21_S244	2.68701	1	Nonresponders	53	P	8.96959e-15
Csnk1e_S363	Ddx21_S245	2.336	1	Nonresponders	53	P	7.36788e-15
Rps6ka3_T365	Ddx23_S106	7.869	1	Nonresponders	53	P	-0.0314374
Rps6ka3_S369	Ddx23_S108	4.57714	1	Nonresponders	53	P	0.355722
Csnk1e_S363	Ddx24_S126	8.91431	1	Nonresponders	53	P	1.0251e-14
Csnk1e_S363	Ddx24_S334	1.78508	1	Nonresponders	53	P	3.98781e-07
Gsk3b_S219	Ddx42_S104	13.3331	1	Nonresponders	53	D	0.164559
PKB473	Dennd1a_S520	3.49969	1	Nonresponders	53	P	0.000429988
PKB308	Dennd1a_S592	2.21406	1	Nonresponders	53	P	-0.00389458
PKB473	Dennd1a_T707	2.26081	1	Nonresponders	53	P	0.00198644
ERK	Dennd4c_S740	4.68769	1	Nonresponders	53	D	0.700333
Gsk3b_S219	Dido1_S8	6.81372	1	Nonresponders	53	P	-0.171588
Csnk1e_S363	Dkc1_S451	3.48599	1	Nonresponders	53	P	3.52377e-15
Cdkn1b_S10	Dkc1_S481	12.8315	1	Nonresponders	53	D	-0.000545252
Csnk1e_S363	Dkc1_T485	9.42652	1	Nonresponders	53	P	7.68822e-15
Rps6kb1_S447	Dnajc2_S60	10.026	1	Nonresponders	53	P	-0.00340552
S6K	Dnajc2_S63	8.81565	1	Nonresponders	53	P	-0.0111844
Rps6_S247	Dnajc2_T48	8.02384	1	Nonresponders	53	P	-0.277487
Htt_S621	Dnajc5_S15	12.7461	1	Nonresponders	53	D	0.0079202
Gsk3b_Y216	Dock7_S182	4.82879	1	Nonresponders	53	P	-0.000565026
Mapk14_Y182	Dock7_S439	4.13936	1	Nonresponders	53	P	-0.297908
Mapk14_S2	Dock7_S440	7.53068	1	Nonresponders	53	P	0.0422078
Mapk14_Y182	Dock7_S900	1.68874	1	Nonresponders	53	P	9.61028e-16
Ssh1_S929	Dstn_S3	7.09207	1	Nonresponders	53	P	-0.123538
Rps6ka3_S375	Ebag9_S36	2.1474	1	Nonresponders	53	D	0.115
PKB473	Eef2k_S76	11.4119	1	Nonresponders	53	P	0.016094
PKB473	Eef2k_S77	3.49754	1	Nonresponders	53	P	0.00767824
PKB308	Eif2ak3_S551	7.2511	1	Nonresponders	53	P	-0.101362
Eif2b5_S540	Eif2b4_S63	2.68117	1	Nonresponders	53	P	-0.0349242
Mtor_S2454	Eif3c_S166	1.84447	1	Nonresponders	53	P	-0.147265
Mtor_S2454	Eif3c_S178	4.32017	1	Nonresponders	53	P	0.000265068
Mtor_S2454	Eif3c_S181	4.32017	1	Nonresponders	53	P	0.00026533
Rptor_S877	Eif3c_S182	4.5768	1	Nonresponders	53	P	-6.40685e-16
Mtor_T2473	Eif3c_S39	8.01192	1	Nonresponders	53	P	-6.22169e-12
Rptor_S863	Eif3d_S161	9.32056	1	Nonresponders	53	P	0.0112762
Rptor_S859	Eif3h_S183	7.78787	1	Nonresponders	53	P	5.12548e-15
Casp8_S213	Eif4g2_S394	3.47722	1	Nonresponders	53	D	0.301614
Casp8_S213	Eif4g2_T507	0.720243	1	Nonresponders	53	P	-9.25103e-05
Casp8_S188	Eif4g3_S480	3.97468	1	Nonresponders	53	P	-6.98309e-11
Casp7_S16	Eif4g3_S481	3.94573	1	Nonresponders	53	P	-0.00669985
Casp7_S16	Eif4g3_S482	3.43667	1	Nonresponders	53	P	-0.0625537
Casp8_S188	Eif4g3_S483	3.7843	1	Nonresponders	53	P	3.9878e-07
Rps6ka3_S369	Eif5b_S108	5.0176	1	Nonresponders	53	P	1.30467e-08
Mapk14_Y182	Eif5b_S114	1.35787	1	Nonresponders	53	P	-8.23051e-10
Rps6ka3_T365	Eif5b_S137	4.41492	1	Nonresponders	53	P	-0.0310885
Rps6ka3_S415	Eif5b_S139	2.21972	1	Nonresponders	53	P	-0.211447
Rps6ka3_T365	Eif5b_S183	1.64573	1	Nonresponders	53	P	-0.540772
Rps6ka3_S715	Eif5b_S184	5.78381	1	Nonresponders	53	P	-0.601981
Rps6ka3_S369	Eif5b_S187	11.9593	1	Nonresponders	53	P	0.0640808
Mapk14_Y182	Eif5b_S215	0.497172	1	Nonresponders	53	P	-0.183338
Rps6ka3_T365	Eif5b_S223	9.67214	1	Nonresponders	53	P	-0.030995
Prkaca_T198	Ensa_S2	12.1465	1	Nonresponders	53	P	3.98781e-07
Mapk14_S2	Ep400_S850	12.9488	1	Nonresponders	53	P	0.0931523
Rps6ka3_S375	Epb41l1_S430	6.24615	1	Nonresponders	53	P	-0.0100959
Rps6ka3_S715	Epb41l1_S437	14.639	1	Nonresponders	53	P	-0.772661
Rps6ka3_S375	Epb41l1_S460	0.573325	1	Nonresponders	53	D	0.718592
Rps6ka3_T365	Epb41l1_S461	14.2367	1	Nonresponders	53	P	-0.031519
Gsk3b_Y216	Epb41l1_S465	14.4752	1	Nonresponders	53	P	2.2424e-15
Rps6ka3_S375	Epb41l1_S509	3.92224	1	Nonresponders	53	D	0.556883
Rps6ka3_S715	Epb41l1_S545	5.27001	1	Nonresponders	53	D	0.785908
Mapk14_Y182	Epb41l1_S578	2.14653	1	Nonresponders	53	P	-0.155768
Rps6ka3_S369	Epb41l1_S639	3.86527	1	Nonresponders	53	P	0.627337
Rps6ka3_S369	Epb41l1_S648	3.96421	1	Nonresponders	53	D	-0.279023
Gsk3b_S219	Epb41l1_S650	2.38672	1	Nonresponders	53	P	-0.164568
Rps6ka3_S369	Epb41l1_S665	3.70671	1	Nonresponders	53	P	0.270191
Rps6ka3_T365	Epb41l1_S666	3.95761	1	Nonresponders	53	P	-0.378213
Mapk14_S2	Epb41l1_S684	1.0153	1	Nonresponders	53	P	0.0964891
Rps6ka3_S375	Epb41l1_S69	0.462909	1	Nonresponders	53	D	0.285131
Rps6ka3_T365	Epb41l1_S75	5.57153	1	Nonresponders	53	P	-0.0322814
Rps6ka3_S375	Epb41l1_S782	0.785592	1	Nonresponders	53	P	-0.0486069
Rps6ka3_S375	Epb41l1_T33	12.163	1	Nonresponders	53	P	-0.419389
Rps6ka3_S715	Epb41l1_T549	6.50306	1	Nonresponders	53	D	0.785908
Rps6ka3_T365	Epb41l1_T685	6.22912	1	Nonresponders	53	P	-0.0338893
Rps6ka3_S715	Epb41l2_S116	1.42523	1	Nonresponders	53	P	-0.0656892
Rps6ka3_S715	Epb41l2_S18	12.014	1	Nonresponders	53	P	-0.401487
Mapk14_Y182	Epb41l2_S572	1.49471	1	Nonresponders	53	P	-0.176075
Mapk14_S2	Epb41l2_S63	10.3698	1	Nonresponders	53	P	0.000421005
Csnk1e_S363	Epb41l3_S456	14.4543	1	Nonresponders	53	P	3.98781e-07
Csnk1e_S363	Epb41l3_S96	15.415	1	Nonresponders	53	P	3.98781e-07
Csnk1d_S328	Epn2_S173	4.82505	1	Nonresponders	53	P	7.04754e-15
Rps6ka3_S369	Epn2_S192	3.66524	1	Nonresponders	53	P	0.0403858
Rps6ka3_S375	Epn2_S195	4.01281	1	Nonresponders	53	P	-0.00915394
Rps6ka3_S375	Epn2_S431	3.24806	1	Nonresponders	53	P	-0.0841625
Rps6ka3_T365	Epn2_T453	0.998284	1	Nonresponders	53	P	-0.0199104
Gab2_T388	Eps15_S816	1.06936	1	Nonresponders	53	P	-0.126528
Gsk3b_Y216	Eps15l1_S669	4.31531	1	Nonresponders	53	P	0.00070943
Map3k3_S340	Erc1_S17	4.04006	1	Nonresponders	53	D	0.415215
Map3k3_S340	Erc1_S21	10.2904	1	Nonresponders	53	P	-0.261509
Sqstm1_T269	Erc1_S415	1.04981	1	Nonresponders	53	P	-0.158017
Prkaca_S339	Exosc5_S20	9.33066	1	Nonresponders	53	D	-0.00216764
Prkaca_T198	Exosc5_S23	14.3499	1	Nonresponders	53	P	-5.76617e-15
ERK	Fam65a_S417	12.3785	1	Nonresponders	53	P	-0.925961
ERK	Fam65a_S818	13.2126	1	Nonresponders	53	D	0.730158
ERK	Fam65a_S92	3.05754	1	Nonresponders	53	P	-0.148725
PKB308	Fas_T211	1.8178	1	Nonresponders	53	PM	-2.19803e-05
Map3k3_S340	Fasn_S1577	4.72745	1	Nonresponders	53	P	-0.234295
Map3k3_S340	Fasn_S1720	3.63553	1	Nonresponders	53	P	-0.182847
Map3k3_S340	Fasn_S2199	12.3902	1	Nonresponders	53	P	-0.0297496
Map3k3_S340	Fasn_S2201	4.5862	1	Nonresponders	53	P	-0.220173
ERK	Fhod1_S370	7.91075	1	Nonresponders	53	P	-0.695758
ERK	Fhod1_S524	2.58236	1	Nonresponders	53	P	-0.378057
ERK	Fhod1_S527	2.53008	1	Nonresponders	53	P	-0.638982
Ulk1_S479	Flcn_S62	2.01163	1	Nonresponders	53	D	0.120845
Ulk1_S479	Flii_S436	4.56379	1	Nonresponders	53	P	-0.223278
Rps6ka3_S369	Fnbp1_S295	3.83785	1	Nonresponders	53	D	-0.502916
Rps6ka3_S369	Fnbp4_S533	1.3728	1	Nonresponders	53	P	0.422842
G3bp1_S149	G3bp2_S225	6.36014	1	Nonresponders	53	P	3.98781e-07
Mapk14_Y182	G3bp2_T227	4.13431	1	Nonresponders	53	P	-0.106557
Map3k7_S439	Gapvd1_S454	5.99427	1	Nonresponders	53	P	0.118012
Mapk14_S2	Glcci1_S100	10.6056	1	Nonresponders	53	D	-0.0961095
Gsk3b_Y216	Glcci1_S137	7.44546	1	Nonresponders	53	P	0.000694707
Mapk14_S2	Glcci1_S140	3.35818	1	Nonresponders	53	P	0.0480311
Mapk14_S2	Glcci1_S249	12.304	1	Nonresponders	53	PM	0.022762
Gsk3b_S219	Glcci1_S336	8.16297	1	Nonresponders	53	P	-0.16456
Mapk14_Y182	Glcci1_S36	2.67914	1	Nonresponders	53	P	-0.215001
Mapk14_Y182	Glcci1_S97	8.38343	1	Nonresponders	53	P	-0.347442
Mapk14_Y182	Glcci1_S99	7.77656	1	Nonresponders	53	P	-0.347441
Gsk3b_S219	Golga2_S934	11.033	1	Nonresponders	53	D	0.164521
Slc9a3r1_S264	Grk6_S484	1.62383	1	Nonresponders	53	P	-0.012566
Slc9a3r1_S264	Grk6_T485	5.7427	1	Nonresponders	53	P	-0.0125656
Smarcc2_S302	Gtf2f1_S385	5.4887	1	Nonresponders	53	P	-1.60171e-15
Smarcc1_S327	Gtf2f1_T384	0.955067	1	Nonresponders	53	P	0.370252
Cdk9_T186	Gtf2f2_S248	9.5623	1	Nonresponders	53	P	0.4475
Arrb1_S404	Gtpbp1_S25	7.06983	1	Nonresponders	53	P	0.000701655
Rps6ka3_S375	Gys1_S645	5.29242	1	Nonresponders	53	P	-0.263611
Rps6ka3_S375	Gys1_S652	2.41182	1	Nonresponders	53	P	-0.79515
Sphk2_S364	Hdac2_S394	2.39804	1	Nonresponders	53	P	0.494541
Sphk2_S364	Hdac2_S422	11.4022	1	Nonresponders	53	P	0.376
Sphk2_S364	Hdac2_S424	11.4022	1	Nonresponders	53	P	0.377608
Csnk1e_S363	Hdgf_S128	9.7318	1	Nonresponders	53	P	7.04754e-15
Csnk1e_S363	Hdgf_S132	5.3275	1	Nonresponders	53	P	3.98781e-07
Csnk1e_S363	Hdgf_S133	4.92471	1	Nonresponders	53	P	4.80514e-15
Csnk1e_S363	Hdgf_S165	11.3269	1	Nonresponders	53	P	3.98781e-07
Csnk1e_S363	Hdgf_S202	15.37	1	Nonresponders	53	PM	-0.00147508
Csnk1e_S363	Hdgf_T200	15.5021	1	Nonresponders	53	D	-3.57131e-05
Gsk3b_Y216	Helb_S945	2.89815	1	Nonresponders	53	P	-0.000301761
Rps6ka3_S375	Hist1h1d_S2	0.495044	1	Nonresponders	53	P	-0.00916384
Rps6kb1_S447	Hmga1_S36	14.9476	1	Nonresponders	53	P	-0.22203
Map3k7_S439	Hnrnpa2b1_S259	0.656743	1	Nonresponders	53	P	0.0966778
Map3k7_S439	Hnrnpa2b1_S344	1.33838	1	Nonresponders	53	P	0.228606
Gsk3b_S219	Hnrnph2_S104	3.41783	1	Nonresponders	53	P	-0.164938
Med1_S1225	Hsd17b4_S107	1.06943	1	Nonresponders	53	P	-0.000781838
Med1_S1158	Hsd17b4_S308	1.95403	1	Nonresponders	53	P	3.98776e-07
Hsf1_S303	Hsp90b1_S306	2.17328	1	Nonresponders	53	D	-0.198152
Map3k3_S340	Hspa4_T540	13.9276	1	Nonresponders	53	PM	-0.861779
Cblb_S525	Ifngr1_S370	8.71996	1	Nonresponders	53	P	-0.0255956
Cblb_S529	Ifngr1_T302	7.34379	1	Nonresponders	53	P	-0.390812
Cblb_S480	Ifngr1_T373	5.10986	1	Nonresponders	53	P	0.0395966
Rps6ka3_S715	Irf2bpl_S195	4.7696	1	Nonresponders	53	P	-0.0394358
Rps6ka3_T365	Irf2bpl_S526	11.9358	1	Nonresponders	53	PM	0.00196342
Gsk3b_Y216	Irf2bpl_S636	9.75714	1	Nonresponders	53	P	0.000694456
Rps6ka3_S715	Irf2bpl_S637	0.479074	1	Nonresponders	53	P	-0.748837
AS160	Irs1_S1207	14.692	1	Nonresponders	53	PM	-0.0172398
Irs1_S444	Irs2_S728	14.6708	2	Nonresponders	53	P	0.132581
Rps6ka3_S369	Irs2_S728	14.6708	1	Nonresponders	53	D	0.132581
Mtor_S2454	Irs2_T360	11.9799	1	Nonresponders	53	P	0.05824
Rps6ka3_S415	Itsn1_S334	1.29597	1	Nonresponders	53	P	-0.248886
Akt1_S129	Itsn1_S335	14.248	1	Nonresponders	53	P	0.000171192
Rps6ka3_T365	Itsn1_S558	10.1021	1	Nonresponders	53	P	-0.810738
Rps6ka3_S715	Itsn1_S623	1.38199	1	Nonresponders	53	P	-0.443428
PKB473	Itsn1_S638	3.28795	1	Nonresponders	53	P	0.00975063
Rps6ka3_S375	Itsn1_S902	3.01658	1	Nonresponders	53	P	-0.0110196
PKB308	Iws1_S261	1.49752	1	Nonresponders	53	P	-1.29617e-11
Akt1_S122	Iws1_S263	1.49752	1	Nonresponders	53	P	7.35186e-13
PKB308	Iws1_S306	4.52183	1	Nonresponders	53	P	-7.7555e-13
Akt1_S129	Iws1_S307	2.46951	1	Nonresponders	53	P	0.00316078
PKB473	Iws1_S309	2.31079	1	Nonresponders	53	P	5.4266e-13
PKB473	Iws1_S321	1.27061	1	Nonresponders	53	D	-0.0358282
PKB308	Iws1_S343	2.35	1	Nonresponders	53	P	-1.42623e-11
Akt1_S126	Iws1_S345	7.49375	1	Nonresponders	53	P	-0.0122321
Akt1_S126	Iws1_S366	11.9053	1	Nonresponders	53	P	-1.56904e-11
PKB473	Iws1_S368	12.0742	1	Nonresponders	53	P	5.38816e-13
PKB308	Iws1_S372	4.8898	1	Nonresponders	53	P	-5.91481e-12
PKB308	Iws1_S384	3.84267	1	Nonresponders	53	P	-8.64284e-13
PKB473	Iws1_S386	3.71624	1	Nonresponders	53	P	5.40738e-13
Akt1_S129	Iws1_S458	5.82854	1	Nonresponders	53	P	0.00316336
Akt1_S126	Iws1_S460	5.82895	1	Nonresponders	53	P	3.20343e-16
Trim24_S745	Kif1b_S1057	2.21341	1	Nonresponders	53	P	0.367719
Gsk3b_Y216	Kif1b_S1605	1.28392	1	Nonresponders	53	P	0.000696847
Rps6ka3_S715	Kif1c_S1031	2.81006	1	Nonresponders	53	P	-0.421603
Rps6ka3_T365	Kif1c_S674	1.18748	1	Nonresponders	53	P	-0.458022
Rps6ka3_S415	Kif1c_S676	2.02819	1	Nonresponders	53	P	-0.378775
Rps6ka3_T365	Kif1c_S680	11.0615	1	Nonresponders	53	P	-0.0311491
Csnk1e_S363	Kif21a_T568	4.53115	1	Nonresponders	53	P	3.98781e-07
Csnk1e_S363	Kif21a_T581	4.54333	1	Nonresponders	53	P	3.98781e-07
PKB473	Lbr_S103	6.5148	1	Nonresponders	53	P	0.00121421
Map3k3_S340	Lima1_S225	11.8385	1	Nonresponders	53	P	-0.252109
Map3k3_S340	Lima1_S360	10.0023	1	Nonresponders	53	P	-0.444664
Map3k3_S340	Lima1_S488	2.19341	1	Nonresponders	53	P	-0.34713
Mtor_S1261	Lpin1_S252	13.7023	1	Nonresponders	53	D	-0.00959613
Mtor_S2478	Lpin1_S252	13.7023	1	Nonresponders	53	PM	-0.00959613
Mtor_T2474	Lpin1_S254	3.55811	1	Nonresponders	53	P	0.00492192
Mtor_S1261	Lpin1_S285	5.49995	1	Nonresponders	53	D	-0.0976641
Mtor_S2448	Lpin1_S285	5.49995	1	Nonresponders	53	PM	-0.0976641
Mtor_S2448	Lpin1_S287	3.78106	1	Nonresponders	53	P	-0.0289099
Mtor_S1261	Lpin1_S295	1.07793	1	Nonresponders	53	D	-0.099942
Mtor_S2448	Lpin1_S450	10.9779	1	Nonresponders	53	P	-0.0731751
Mtor_S2481	Lpin1_S599	1.2954	1	Nonresponders	53	P	-0.0435381
Mtor_T2473	Lpin1_S600	4.22025	1	Nonresponders	53	P	-0.0245587
Mtor_S1261	Lpin1_S601	4.34038	1	Nonresponders	53	P	0.0750127
Mtor_S2454	Lpin1_S602	4.52422	1	Nonresponders	53	P	0.000367724
Mtor_S2478	Lpin1_T564	7.59807	1	Nonresponders	53	P	-0.0858536
Prkaca_S339	Lrrfip1_S271	3.50271	1	Nonresponders	53	P	1.92206e-15
Gsk3b_S219	Lrrfip1_S547	4.99578	1	Nonresponders	53	P	-0.172654
Rps6ka3_S375	Macf1_S1517	14.6756	1	Nonresponders	53	P	-0.320901
Rps6ka3_S375	Macf1_S1520	3.31588	1	Nonresponders	53	D	0.755319
Bag3_S281	Map1a_S1146	7.15135	1	Nonresponders	53	P	0.0107571
Bag3_S274	Map1a_S1219	3.14994	1	Nonresponders	53	P	-0.0426042
Bag3_S274	Map1a_S1229	14.5193	1	Nonresponders	53	P	-0.0921182
Bag3_S285	Map1a_S1397	10.4017	1	Nonresponders	53	P	0.069397
Mapk14_S2	Map1a_S1527	14.3953	1	Nonresponders	53	D	-0.0730584
Rps6ka3_S375	Map1a_S1818	6.91713	1	Nonresponders	53	P	-0.113943
Rps6ka3_S369	Map1a_S1872	1.73702	1	Nonresponders	53	D	-0.118002
Rps6ka3_S375	Map1a_S1886	9.28905	1	Nonresponders	53	P	-0.790107
Rps6ka3_S375	Map1a_S2006	3.92286	1	Nonresponders	53	P	-0.413947
Mapk14_S2	Map1a_S2010	8.23599	1	Nonresponders	53	P	0.0145087
Bag3_S360	Map1a_S2027	8.12372	1	Nonresponders	53	P	-0.312516
Bag3_S380	Map1a_S2320	3.7996	1	Nonresponders	53	P	-0.0934393
Rps6ka3_S375	Map1a_S2447	0.671028	1	Nonresponders	53	P	-1.03431
Bag3_S274	Map1a_S764	2.97465	1	Nonresponders	53	P	-0.0407853
Rps6ka3_T365	Map1a_S765	1.75216	1	Nonresponders	53	P	-0.320987
Bag3_S380	Map1a_S882	5.78721	1	Nonresponders	53	P	-0.0473299
Bag3_S380	Map1a_T912	6.71763	1	Nonresponders	53	P	-0.0173316
Rps6ka3_S415	Map1s_S458	12.4616	1	Nonresponders	53	D	0.578455
PKB308	Map1s_S462	7.34492	1	Nonresponders	53	P	-0.258241
PKB473	Map1s_S465	7.11256	1	Nonresponders	53	P	0.0198486
Rps6ka3_S415	Map1s_S658	5.18626	1	Nonresponders	53	P	-0.327058
Rps6ka3_S375	Map1s_S660	11.1593	1	Nonresponders	53	P	-0.0149479
PKB473	Map1s_T659	1.40754	1	Nonresponders	53	P	0.00249479
Rps6ka3_S375	Map2_S1783	11.8657	1	Nonresponders	53	P	-0.579927
PKB308	Map3k4_S449	1.48382	1	Nonresponders	53	D	0.431086
Pak2_S141	Map3k4_S454	14.2992	1	Nonresponders	53	D	0.587487
Dclk1_S332	Map7d1_S544	4.51524	1	Nonresponders	53	P	-0.723901
Dclk1_S332	Map7d1_S548	5.68533	1	Nonresponders	53	P	-0.0913508
Dclk1_S332	Map7d1_S552	1.79927	1	Nonresponders	53	P	-0.457121
ERK	Mast2_S1037	9.52011	1	Nonresponders	53	P	-1.02457
ERK	Mast2_S149	0.775127	1	Nonresponders	53	P	-0.354759
ERK	Mast2_S75	4.77535	1	Nonresponders	53	P	-1.68183e-10
Gsk3b_Y216	Mcm2_S139	6.74399	1	Nonresponders	53	P	0.00069466
Gsk3b_Y216	Mcm2_S140	6.25108	1	Nonresponders	53	P	0.000694654
Gsk3b_S219	Mcm2_S27	8.52479	1	Nonresponders	53	P	-0.16451
Gsk3b_S219	Med14_S1141	11.3333	1	Nonresponders	53	P	-0.0993878
Mark3_S419	Mief1_S94	14.2679	1	Nonresponders	53	P	-0.00723811
Trim24_S812	Mllt3_S413	5.44695	1	Nonresponders	53	P	0.367637
Trim24_S745	Mllt3_S420	5.44797	1	Nonresponders	53	P	0.367675
Trim24_S812	Mllt3_S430	5.57487	1	Nonresponders	53	P	0.214384
Trim24_S812	Mllt3_S484	1.03361	1	Nonresponders	53	P	0.0151776
PKB308	Mlx_S45	2.17648	1	Nonresponders	53	D	0.410182
Trim24_S745	Mnat1_S279	1.23093	1	Nonresponders	53	P	0.367725
Prkaca_S339	Morc2a_S614	0.793783	1	Nonresponders	53	P	2.88308e-15
Prkaca_S339	Morc2a_S741	13.817	1	Nonresponders	53	D	-0.00217893
Raf1_S259	Mprip_S292	3.86493	1	Nonresponders	53	P	-0.0262831
Raf1_S259	Mprip_S992	1.11833	1	Nonresponders	53	P	-0.0262831
Csnk1d_S331	Msh6_S252	10.7814	1	Nonresponders	53	P	0.000658557
Gsk3b_Y216	Msh6_S254	6.83614	1	Nonresponders	53	P	0.000694643
Gsk3b_Y216	Msh6_S256	6.71494	1	Nonresponders	53	P	0.000694703
Csnk1d_S328	Msh6_S261	4.56502	1	Nonresponders	53	P	-7.36788e-15
Gsk3b_S219	Msh6_S63	5.82684	1	Nonresponders	53	P	-0.164569
ERK	Mybbp1a_S722	2.84097	1	Nonresponders	53	P	-1.68138e-10
Map3k3_S340	Myh10_S1989	13.0338	1	Nonresponders	53	D	0.311957
Map3k3_S340	Myh10_S1993	1.18462	1	Nonresponders	53	P	-0.031659
Map3k3_S340	Myh10_S596	1.23758	1	Nonresponders	53	P	-0.00124707
Map3k3_S340	Myo1c_S1006	0.491072	1	Nonresponders	53	P	-0.16182
Map3k3_S340	Myo1c_S373	4.28437	1	Nonresponders	53	P	-0.0123276
Map3k3_S340	Myo1c_S501	2.10666	1	Nonresponders	53	P	-0.101081
Map3k3_S340	Myo1c_S829	3.9561	1	Nonresponders	53	P	-0.0995977
PKB308	Ncor2_S1023	14.5532	1	Nonresponders	53	P	-0.00388071
PKB473	Ncor2_S1781	3.68157	1	Nonresponders	53	P	0.00258306
PKB473	Nedd4l_S371	5.54754	1	Nonresponders	53	P	0.12394
PKB473	Nedd4l_S492	3.05626	1	Nonresponders	53	P	0.00819041
PKB308	Nedd4l_Y494	6.29678	1	Nonresponders	53	P	-0.0110068
Gsk3b_S219	Nfia_S287	15.4872	1	Nonresponders	53	P	-0.164565
Gsk3b_S219	Nfic_S330	7.39376	1	Nonresponders	53	P	-0.171382
Pdpk1_S244	Nipbl_S2484	0.574211	1	Nonresponders	53	P	1.60171e-15
Pdpk1_S244	Nipbl_S2485	0.574211	1	Nonresponders	53	P	-5.69883e-10
Pdpk1_S244	Nipbl_S2487	8.73507	1	Nonresponders	53	P	-0.119129
Pdpk1_S244	Nipbl_S2652	1.68992	1	Nonresponders	53	P	-1.60171e-16
PKB473	Npm1_S225	13.3639	1	Nonresponders	53	P	0.0247905
Prkaca_S339	Nsfl1c_S178	2.8181	1	Nonresponders	53	P	0.00217892
Map3k3_S340	Nudc_S139	10.5197	1	Nonresponders	53	P	-0.022711
Dhx9_S137	Nup98_S623	11.0362	1	Nonresponders	53	P	-0.00119454
Dhx9_S137	Nup98_S888	2.33851	1	Nonresponders	53	P	-0.00218143
Csnk1e_S363	Osbp_S188	2.50988	1	Nonresponders	53	P	1.1212e-14
Csnk1e_S363	Osbp_S191	2.89068	1	Nonresponders	53	P	6.40685e-16
Csnk1e_S363	Osbp_S383	7.70617	1	Nonresponders	53	P	3.98781e-07
Csnk1e_S363	Osbp_T375	13.5088	1	Nonresponders	53	P	1.66578e-14
Mapk14_Y182	Palm_S345	0.980809	1	Nonresponders	53	P	-0.0741608
Gsk3b_S219	Palm_T141	14.76	1	Nonresponders	53	D	0.164567
Gsk3b_S219	Palm_T145	3.09861	1	Nonresponders	53	P	-0.164564
Gsk3b_S219	Pcif1_S19	8.36772	1	Nonresponders	53	P	-0.164549
Foxo1_S284	Pck2_S331	9.62058	1	Nonresponders	53	P	6.26782e-12
Csnk1e_S363	Pdap1_S48	4.19038	1	Nonresponders	53	P	3.98781e-07
Csnk1e_S363	Pdap1_S60	13.3124	1	Nonresponders	53	P	7.36788e-15
Csnk1e_S363	Pdap1_S63	7.64177	1	Nonresponders	53	P	1.15323e-14
Rps6ka3_T365	Pds5b_S1162	12.4551	1	Nonresponders	53	D	0.789733
Gsk3b_S219	Pds5b_S1165	0.271917	1	Nonresponders	53	P	-0.0993878
Rps6ka3_T365	Pds5b_S1166	1.66522	1	Nonresponders	53	P	-0.0318599
Rps6ka3_S375	Pds5b_S1182	0.753845	1	Nonresponders	53	P	-0.361429
Gsk3b_Y216	Pds5b_S1257	1.1724	1	Nonresponders	53	P	0.000694743
Rps6ka3_S375	Pds5b_S1259	3.20199	1	Nonresponders	53	P	-0.0104359
Gsk3b_Y216	Pds5b_S1283	2.88763	1	Nonresponders	53	P	3.20343e-16
Gsk3b_S219	Pds5b_S1358	0.853126	1	Nonresponders	53	P	-0.0993878
Gsk3b_S219	Pds5b_S1383	8.4904	1	Nonresponders	53	P	-0.0993878
Akt1_S129	Pfkm_S667	4.58656	1	Nonresponders	53	P	0.000171192
Fgfr1_Y663	Pgam1_S14	0.61392	1	Nonresponders	53	P	0.0246558
Csnk1e_S363	Pgrmc1_S181	4.00841	1	Nonresponders	53	P	3.98781e-07
Gsk3b_Y216	Phc3_S273	5.20024	1	Nonresponders	53	P	1.92206e-15
Gsk3b_Y216	Phc3_S626	5.34668	1	Nonresponders	53	P	0.000212328
Gsk3b_Y216	Phc3_T619	6.85293	1	Nonresponders	53	P	3.58784e-14
[truncated: 1,996 more rows]
